# Supplementary material for: Sterically hindering the trajectory of nucleophilic attack towards p-benzynes by a properly oriented hydrogen atom: an approach to achieve regioselectivity
Source: Royal Society of Chemistry journal article supplement (doi:10.1039/d1ob00521a), 2021-01-01
Supplement: d1ob00521a1.pdf [file d1ob00521a1.pdf]

## Supporting Information

# Sterically hindering the trajectory of nucleophilic attack towards *p*-benzynes by a properly oriented hydrogen atom: An approach to achieve regioselectivity

Monisha Singha<sup>\*a</sup>, Prabuddha Bhattacharya<sup>b</sup>, Debashis Ray<sup>a</sup>, and Amit Basak<sup>a,c\*</sup>

<sup>a</sup>Department of Chemistry, Indian Institute of Technology Kharagpur 721302 India, <sup>b</sup>Department of Chemistry, Mrinalini Datta Mahavidyalaya, Kolkata 700 051, India, <sup>c</sup>School of Bioscience, Indian Institute of Technology Kharagpur 721302 India.

**\*Corresponding authors**

<sup>†</sup>[singhamonishachem@iitkgp.ac.in](mailto:singhamonishachem@iitkgp.ac.in); [absk@chem.iitkgp.ernet.in](mailto:absk@chem.iitkgp.ernet.in)

## Table of Contents

- Experimental section for intermediated compounds.....S2-S5
- NMR Spectra of enediynes and final halogenated compounds.....S6-S13
- NMR Spectra of intermediated compounds.....S14-S18
- <sup>1</sup>H NMR spectra of crude reaction products.....S19-S20
- ORTEP diagram and crystal data .....S21-S25
- Coordinates and energies of the geometry optimized diradicals..... S26-45
- References.....S46

## Experimental Section

### 5.6.1 Chemical synthesis and characterization

#### General experimental details

All reactions were performed under a nitrogen atmosphere unless otherwise stated. Glassware used in reactions was thoroughly oven-dried. All commercial grade reagents were used without further purification and solvents were dried prior to use following standard protocol. TLC was carried out on precoated plates (silica gel 60 F<sub>254</sub>), and the spots were visualized by exposure to UV light and/or by staining with iodine. All crude products were purified by silica gel flash column chromatography (230–400 mesh) with petroleum ether and ethyl acetate as eluent and characterized by NMR and mass spectrometry unless otherwise mentioned. Melting points were determined in open capillary tubes and are reported as uncorrected. <sup>1</sup>H and <sup>13</sup>C NMR spectra for all the compounds were recorded at 400/500 MHz and 100/125 MHz (Bruker Ultrashield™ 400, Ascend™ 500), respectively. The spectra were recorded in deuteriochloroform (CDCl<sub>3</sub>) and deuterated dimethyl sulfoxide (DMSO-*d*<sub>6</sub>) as solvent at room temperature. Chemical shifts are reported in ppm from tetramethylsilane with the solvent resonance as internal standard (CDCl<sub>3</sub>: δ<sub>H</sub> = 7.26, δ<sub>C</sub> = 77.16 ppm; ; DMSO-*d*<sub>6</sub>: δ<sub>H</sub> = 2.50, δ<sub>C</sub> = 39.52 ppm). Data for <sup>1</sup>H NMR are reported as follows: chemical shift (δ ppm), multiplicity (s = singlet, brs = broad singlet, d = doublet, t = triplet, q = quartet, m = multiplet, dd = doublet of doublet), coupling constant (Hz), integration. Data for <sup>13</sup>C NMR are reported as chemical shift. HRMS spectra using ESI were recorded on an ESI-FTMS mass spectrometer. Single crystal X-ray data was collected on a Bruker SMART APEXII CCD diffractometer using graphite-monochromated Mo-Kα radiation (0.71073 Å).

#### Experimental Procedure and Data analysis of the synthesized compounds

(i) *Synthesis of the arene triflate (4)*. Triflate protection of commercially available 1-bromo-2-naphthol **3** (0.3 g, 1.345 mmol, 1 eq) was carried out by the reaction with trifluoromethanesulfonic anhydride (0.271 mL, 1.614 mmol, 1.2 eq) in presence of dry

triethylamine (0.394 mL, 2.825 mmol, 2.1 eq) in dichloromethane (7 mL) at 0 °C to room temperature for 30 min. The reaction was quenched by adding water. The mixture was extracted by dichloromethane and washed with 2(N) HCl, NaHCO<sub>3</sub>, dried over Na<sub>2</sub>SO<sub>4</sub> and subjected to column chromatography for further purification to afford the compounds **4**.

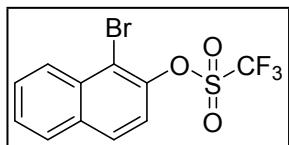

**1-bromonaphthalen-2-yl trifluoromethanesulfonate<sup>1</sup> (4)**. Yield: 0.43 g, 90%; State: White semi-solid; <sup>1</sup>H NMR (400 MHz, CDCl<sub>3</sub>) δ 8.33 (d, *J* = 8.4 Hz, 1H), 7.90 (d, *J* = 8.8 Hz, 2H), 7.71 (t, *J* = 7.5 Hz, 1H), 7.63 (t, *J* = 7.5 Hz, 1H), 7.44 (d, *J* = 9.2 Hz, 1H). <sup>13</sup>C{<sup>1</sup>H} NMR (125 MHz, CDCl<sub>3</sub>) δ 145.0, 132.9, 132.5, 129.7, 128.7, 128.3, 127.7, 127.4, 119.7, 116.1. HRMS [ESI-TOF] calcd for C<sub>10</sub>H<sub>8</sub>Br (M-OTf+H)<sup>+</sup> 206.9809, found 206.9812.

*(ii) Chemoselective Sonogashira coupling of arene triflate<sup>2</sup> with terminal alkyne for synthesis of **5a** & **5b***. A solution of the triflate **4** (0.132 g, 0.372 mmol, 1 eq) dissolved in dry DMF (7 mL) and triethylamine (0.103 mL, 0.743 mmol, 2 eq) was degassed with argon for 10 min. To this solution, Pd(PPh<sub>3</sub>)<sub>4</sub> (0.021 g, 0.019 mmol, 0.05 eq), CuI (0.007 g, 0.037 mmol, 0.1 eq) and tosyl-protected homopropargyl amine (0.091 g, 0.409 mmol, 1.1 eq) (for **5a**) or propargyl alcohol (24 μL, 0.409 mmol, 1.1 eq) (for **5b**) were added and then heated at 60 °C for 3.5 h. Completion of the reaction was confirmed by TLC and the reaction was quenched by adding water. The organic layer was extracted with ethyl acetate, washed with aq. NH<sub>4</sub>Cl solution, dried over anhydrous Na<sub>2</sub>SO<sub>4</sub> and was subjected to column chromatography for further purification to afford the compounds **5a** and **5b**.

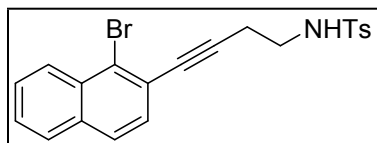

**N-(4-(1-bromonaphthalen-2-yl)but-3-yn-1-yl)-4-methylbenzenesulfonamide (5a)**. Yield: 138 mg, 87%; State: Brown viscous oil; <sup>1</sup>H NMR (400 MHz, CDCl<sub>3</sub>) δ 8.25 (d, *J* = 8.8 Hz, 1H), 7.80 (t, *J* = 8.2 Hz, 3H), 7.71 (d, *J* = 8.4 Hz, 1H), 7.60 (t, *J* = 7.8 Hz, 1H), 7.52 (t, *J* = 7.4 Hz, 1H), 7.39 (d, *J* = 8.8 Hz, 1H), 7.28 (d, *J* = 8.0 Hz, 2H), 5.20 (s, 1H), 3.27 (br t, *J* = 6.8 Hz, 2H), 2.67 (t, *J* = 6.4 Hz, 2H), 2.38 (s, 3H). <sup>13</sup>C{<sup>1</sup>H} NMR (100 MHz, CDCl<sub>3</sub>) δ 143.7, 137.1, 133.7, 132.2, 129.9, 129.0, 128.3, 128.1, 128.0, 127.7, 127.3, 127.2, 126.5, 123.1, 91.6, 83.2, 41.9, 21.6, 21.1. HRMS [ESI-TOF] calcd for C<sub>21</sub>H<sub>18</sub>BrNO<sub>2</sub>SH (M+H)<sup>+</sup> 428.0320, found 428.0321.

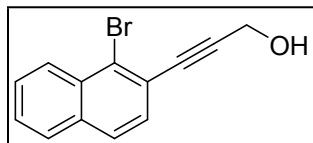

**3-(1-bromonaphthalen-2-yl)prop-2-yn-1-ol (5b).** Yield: 62 mg, 64%; State: Brown viscous oil;  $^1\text{H}$  NMR (500 MHz,  $\text{CDCl}_3$ )  $\delta$  8.26 (d,  $J = 8.5$  Hz, 1H), 7.76 (d,  $J = 8.0$  Hz, 1H), 7.70 (d,  $J = 8.5$  Hz, 1H), 7.60 – 7.57 (m, 1H), 7.52 – 7.49 (m, 1H), 7.47 (d,  $J = 8.5$  Hz, 1H), 4.63 (s, 2H).  $^{13}\text{C}$  NMR (125 MHz,  $\text{CDCl}_3$ )  $\delta$  133.9, 132.2, 129.1, 128.3, 128.0, 127.9, 127.6, 127.4, 126.5, 122.8, 92.8, 85.6, 51.9. MS (ESI)  $m/z$  for  $\text{C}_{13}\text{H}_{10}\text{BrO}$  ( $\text{M}+\text{H}$ ) $^+$  261.1772.

Sonogashira coupling of bromo arene 5a with terminal alkyne for synthesis of compounds 6a. To a degassed (argon) solution of **5a** (0.062 g, 0.145 mmol, 1 eq) in dry n-butylamine (5 mL),  $\text{Pd}(\text{PPh}_3)_4$  (0.013 g, 0.012 mmol, 0.08 eq) and propargyl alcohol (10  $\mu\text{L}$ , 0.174 mmol, 1.2 eq) were added and the reaction mixture was refluxed at 80  $^\circ\text{C}$  for 24-28 h. The reaction was monitored by TLC. After completion of the reaction, it was cooled to room temperature and quenched with water. The organic layer was extracted with EtOAc, washed with brine, dried over  $\text{Na}_2\text{SO}_4$  and was subjected to column chromatography for further purification to afford the compound **6a**.

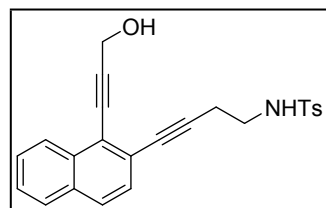

**N-(4-(1-(3-hydroxyprop-1-yn-1-yl)naphthalen-2-yl)but-3-yn-1-yl)-4-methylbenzene sulfonamide (6a).** Yield: 42 mg, 72%; State: Brown viscous oil;  $^1\text{H}$  NMR (400 MHz,  $\text{CDCl}_3$ )  $\delta$  8.32 (d,  $J = 8.4$  Hz, 1H), 7.80 (d,  $J = 8.0$  Hz, 3H), 7.72 (d,  $J = 8.5$  Hz, 1H), 7.59 (t,  $J = 7.6$  Hz, 1H), 7.52 (t,  $J = 7.6$  Hz, 1H), 7.37 (d,  $J = 8.8$  Hz, 1H), 7.23 (d,  $J = 8.0$  Hz, 2H), 5.67 (s, 1H), 4.77 (s, 2H), 3.25 – 3.24 (m, 2H), 2.64 (t,  $J = 5.8$  Hz, 2H), 2.36 (s, 3H).  $^{13}\text{C}\{^1\text{H}\}$  NMR (125 MHz,  $\text{CDCl}_3$ )  $\delta$  143.3, 136.8, 133.3, 132.1, 129.9, 128.5, 128.3, 128.0, 127.6, 127.3, 127.2, 126.0, 124.0, 123.5, 97.6, 90.8, 83.3, 82.5, 52.4, 41.3, 21.6, 20.6. HRMS [ESI-TOF] calcd for  $\text{C}_{24}\text{H}_{21}\text{NO}_3\text{SH}$  ( $\text{M}+\text{H}$ ) $^+$  404.1320, found 404.1322.

Sonogashira coupling of bromo arene 5b with terminal alkyne for synthesis of compounds 6b. To a solution of **5b** (0.1 g, 0.383 mmol, 1 eq) in dry DMF (4ml) mixed with dry triethylamine (2ml) and degassed with argon for 15 min,  $\text{Pd}(\text{PPh}_3)_4$  (0.022 g, 0.019 mmol, 0.05 eq), CuI (0.007 g, 0.038 mmol, 0.1 eq) and 1.1 eq of tosyl-protected homopropargyl amine were added and the reaction mixture was refluxed at 80  $^\circ\text{C}$  for 22 h. The reaction was monitored by TLC. After completion of the reaction, it was cooled to room temperature and quenched with water. The organic layer was extracted with EtOAc, washed with aq.  $\text{NH}_4\text{Cl}$  solution, dried over anhydrous

Na<sub>2</sub>SO<sub>4</sub> and was subjected to column chromatography for further purification to afford the compound **6b**.

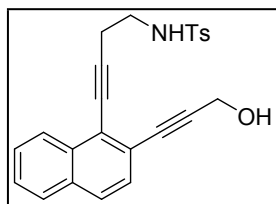

**N-(4-(2-(3-hydroxyprop-1-yn-1-yl)naphthalen-1-yl)but-3-yn-1-yl)-4-methylbenzene sulfonamide (6b)**. Yield: 117 mg, 76%; State: Brown viscous oil; <sup>1</sup>H NMR (400 MHz, CDCl<sub>3</sub>) δ 8.18 (d, *J* = 7.6 Hz, 1H), 7.80 (d, *J* = 8.4 Hz, 2H), 7.76 – 7.73 (m, 2H), 7.54 – 7.49 (m, 2H), 7.31 (d, *J* = 8.0 Hz, 1H), 7.20 (d, *J* = 8.4 Hz, 2H), 4.66 (s, 2H), 3.29 (t, *J* = 6.0 Hz, 2H), 2.75 (t, *J* = 6.0 Hz, 2H), 2.42 (s, 3H). HRMS [ESI-TOF] calcd for C<sub>24</sub>H<sub>22</sub>NO<sub>3</sub>S (M+H)<sup>+</sup> 404.1320, found 404.1317.

## NMR Spectra of enediynes and final halogenated compounds

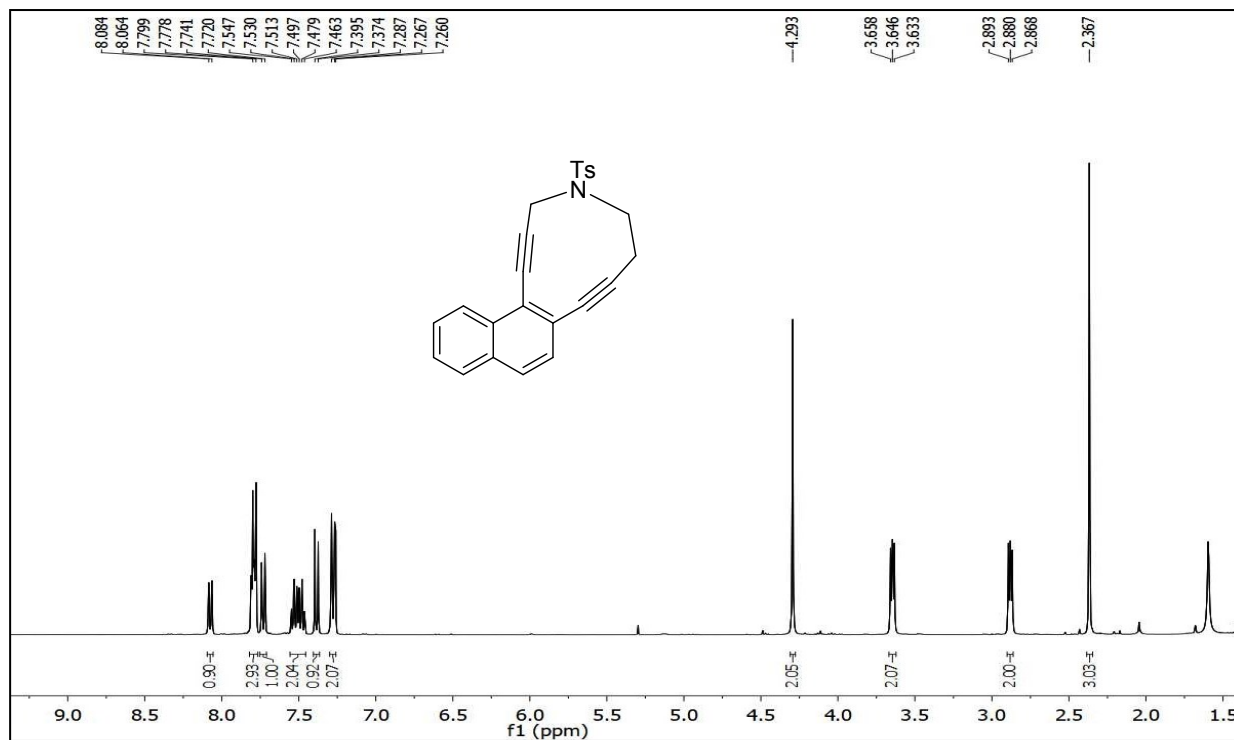

<sup>1</sup>H NMR spectrum (400 MHz, CDCl<sub>3</sub>) of the compound **1a**

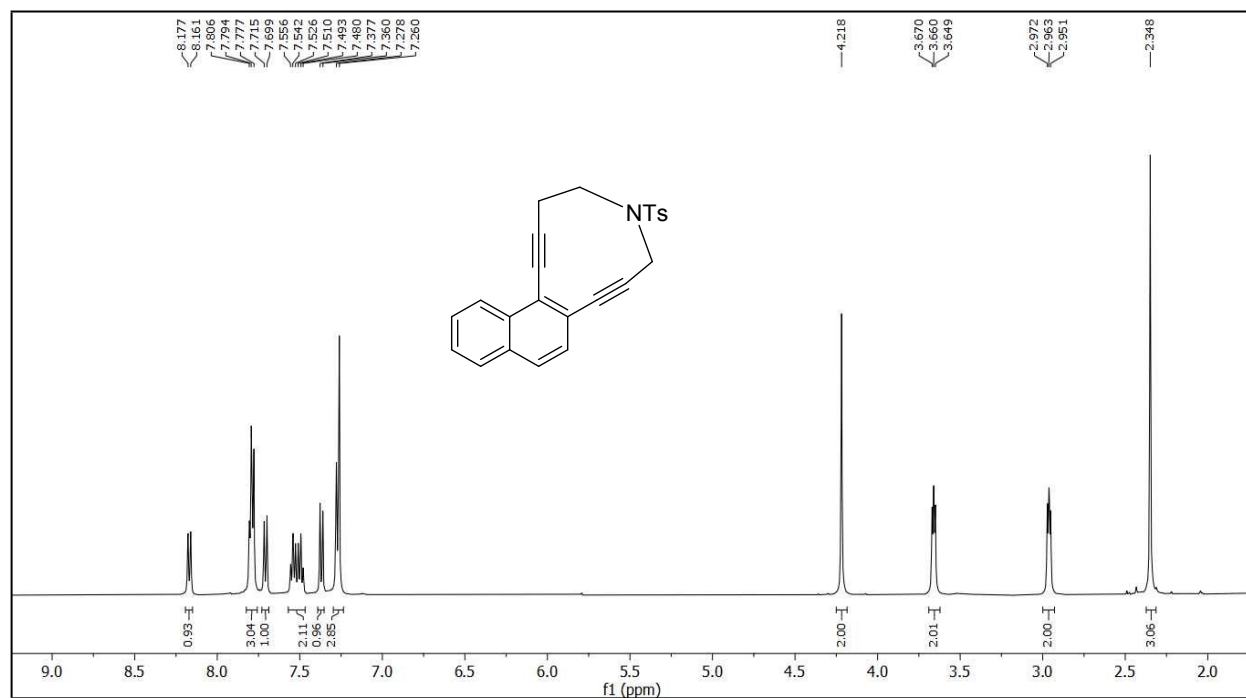

<sup>1</sup>H NMR spectrum (500 MHz, CDCl<sub>3</sub>) of the compound **1b**

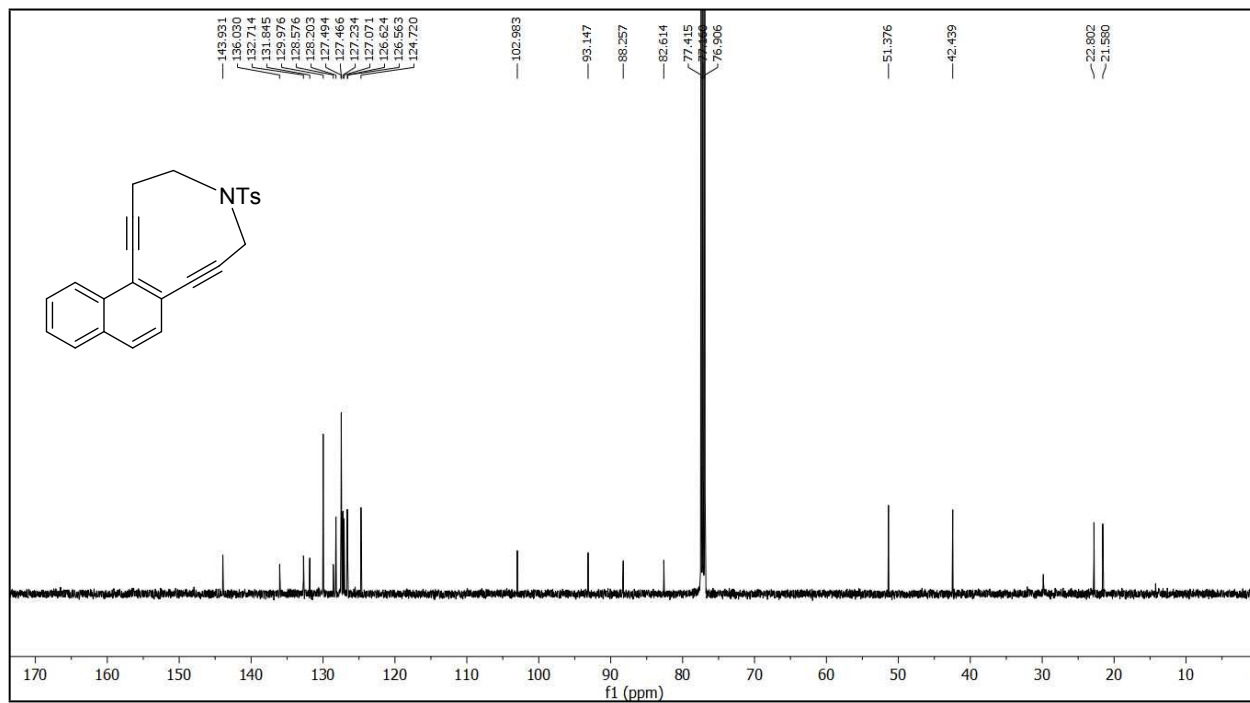

$^{13}\text{C}$  NMR spectrum (125 MHz,  $\text{CDCl}_3$ ) of the compound **1b**

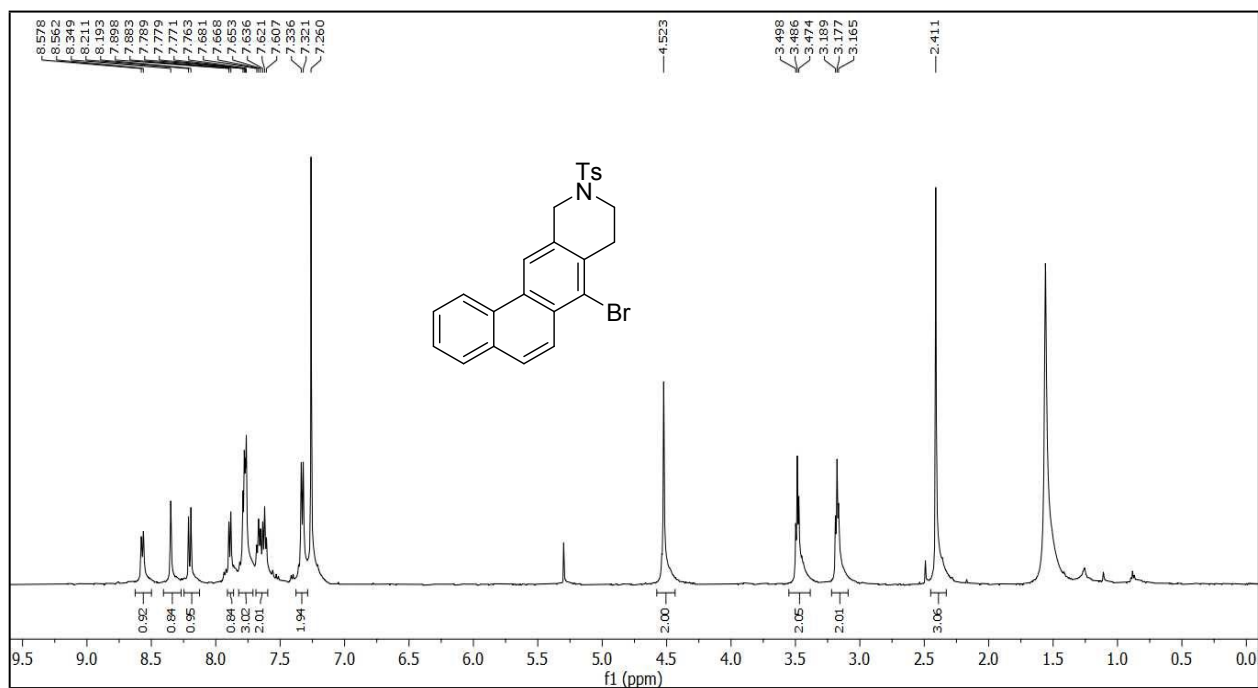

$^1\text{H}$  NMR spectrum (500 MHz,  $\text{CDCl}_3$ ) of the compound **2.1a**

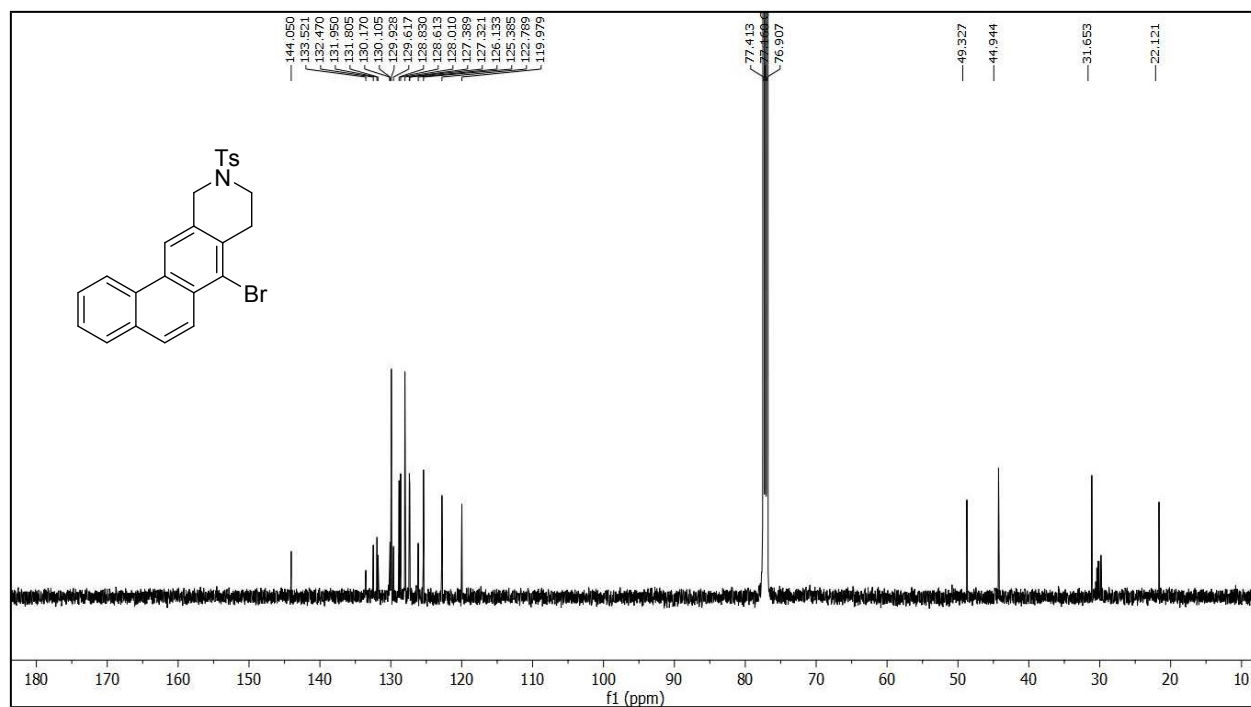

<sup>13</sup>C NMR spectrum (125 MHz, CDCl<sub>3</sub>) of the compound **2.1a**

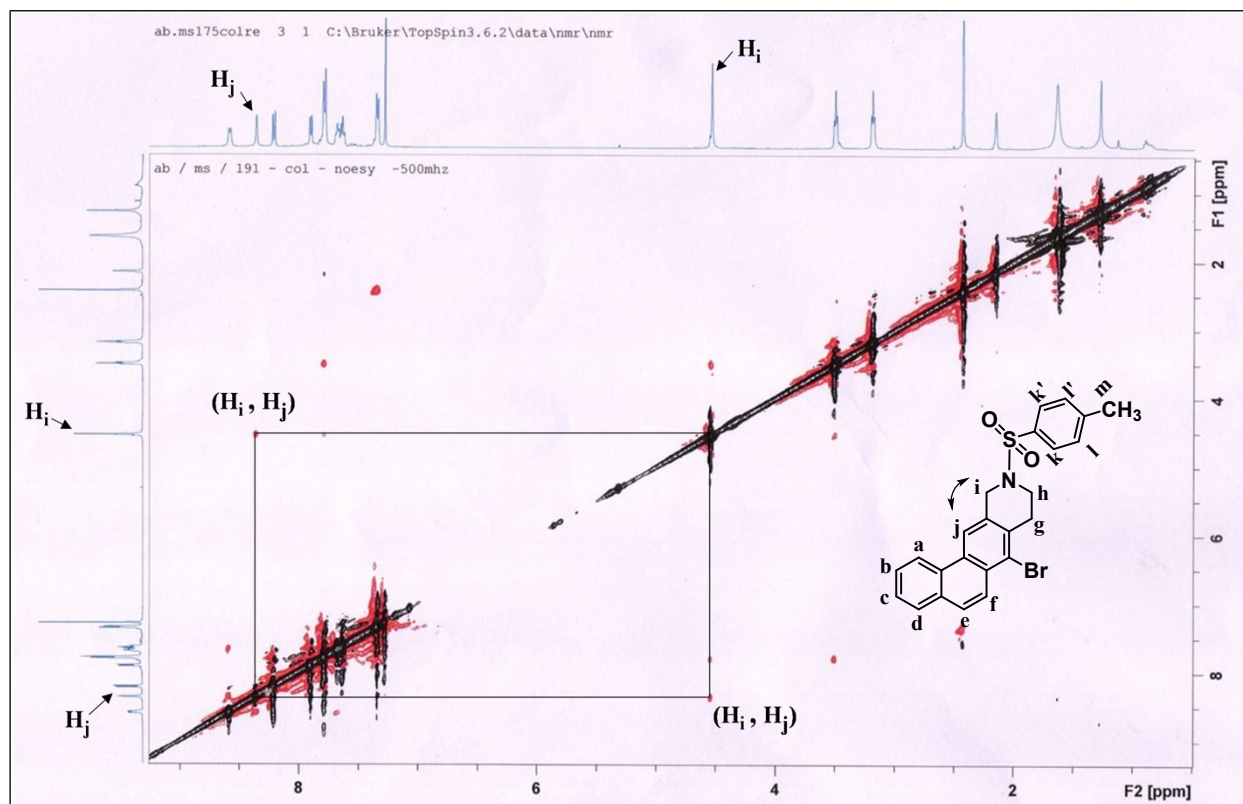

NOESY spectrum of compound **2.1a** in CDCl<sub>3</sub>



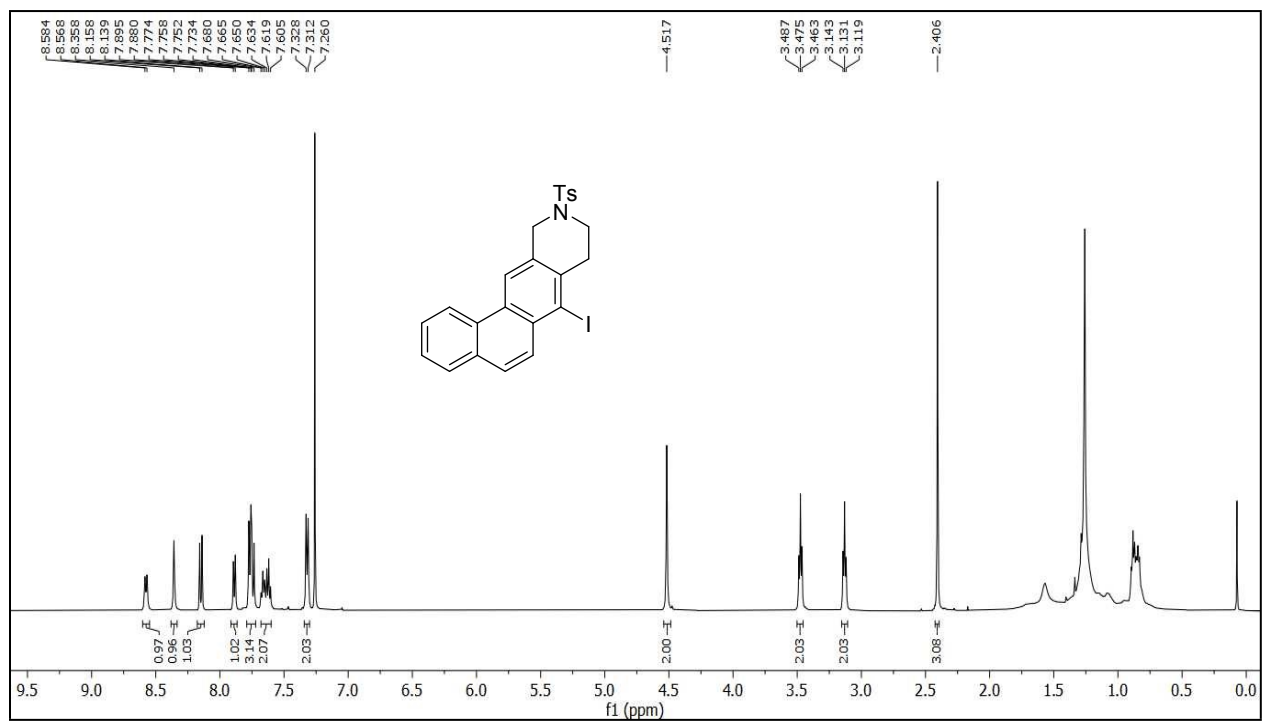

$^1\text{H}$  NMR spectrum (500 MHz,  $\text{CDCl}_3$ ) of the compound **2.2a**

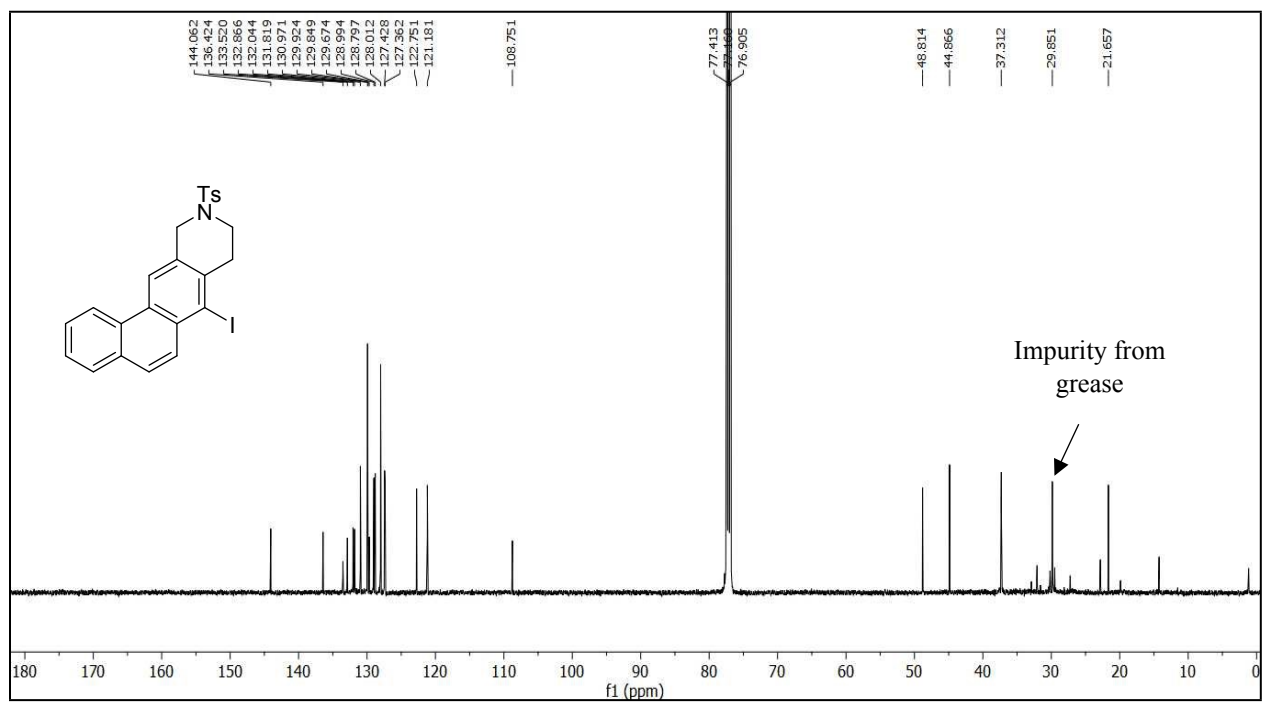

$^{13}\text{C}$  NMR spectrum (125 MHz,  $\text{CDCl}_3$ ) of the compound **2.2a**

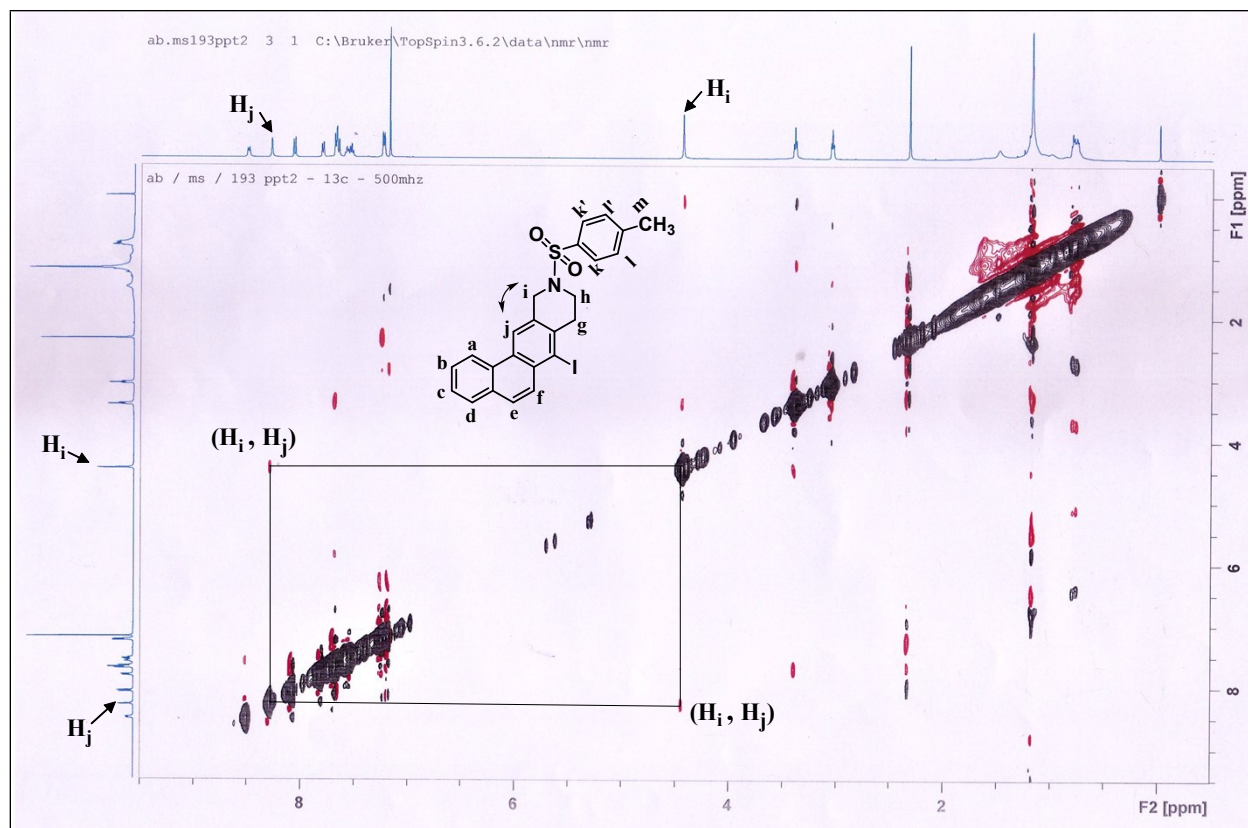

NOESY spectrum of compound **2.2a** in CDCl<sub>3</sub>

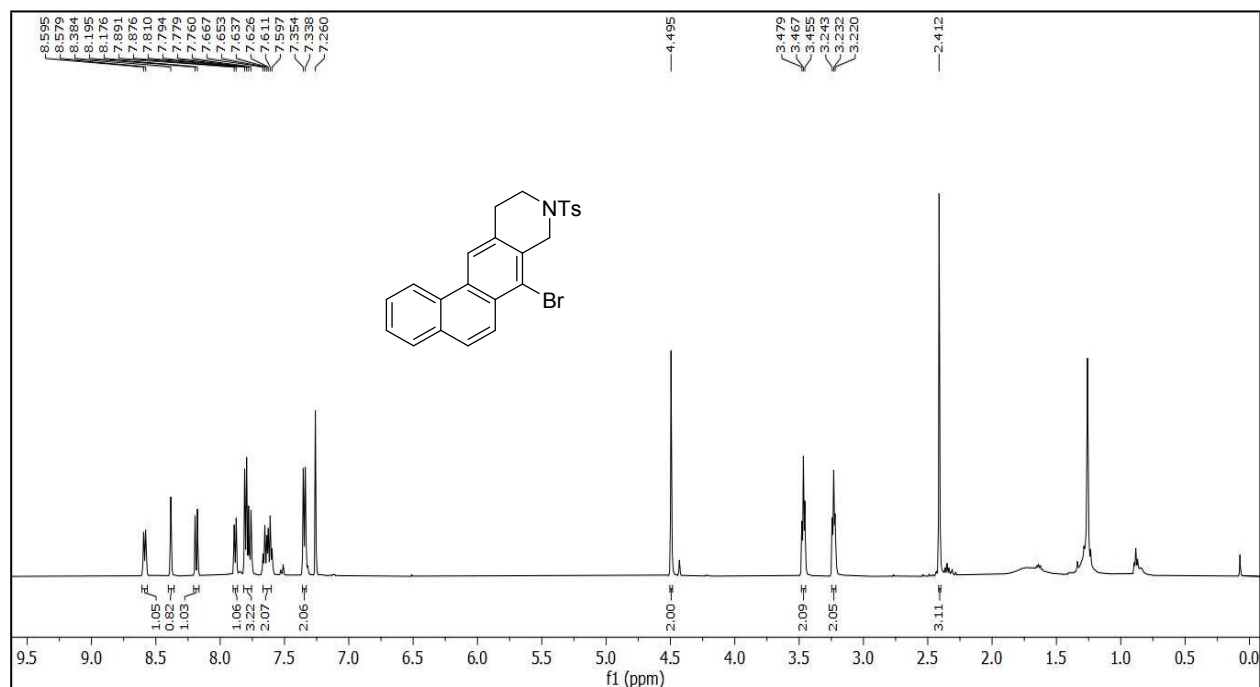

<sup>1</sup>H NMR spectrum (500 MHz, CDCl<sub>3</sub>) of the compound **2.1b**

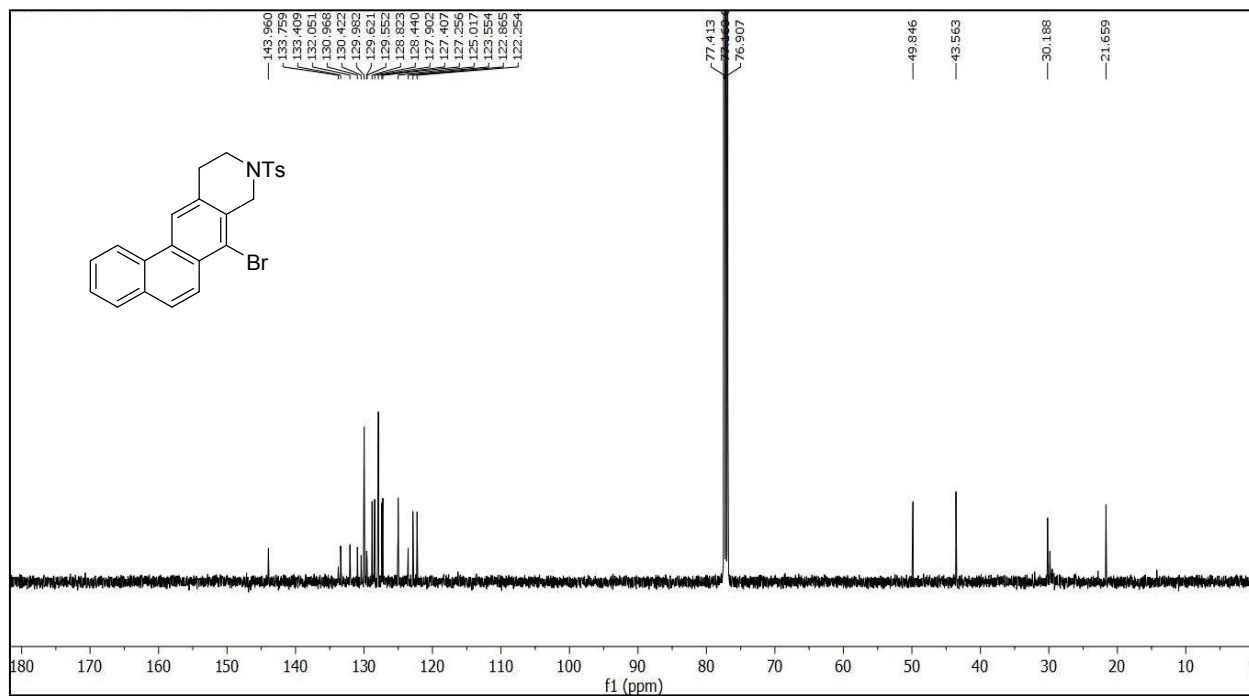

$^{13}\text{C}$  NMR spectrum (125 MHz,  $\text{CDCl}_3$ ) of the compound **2.1b**

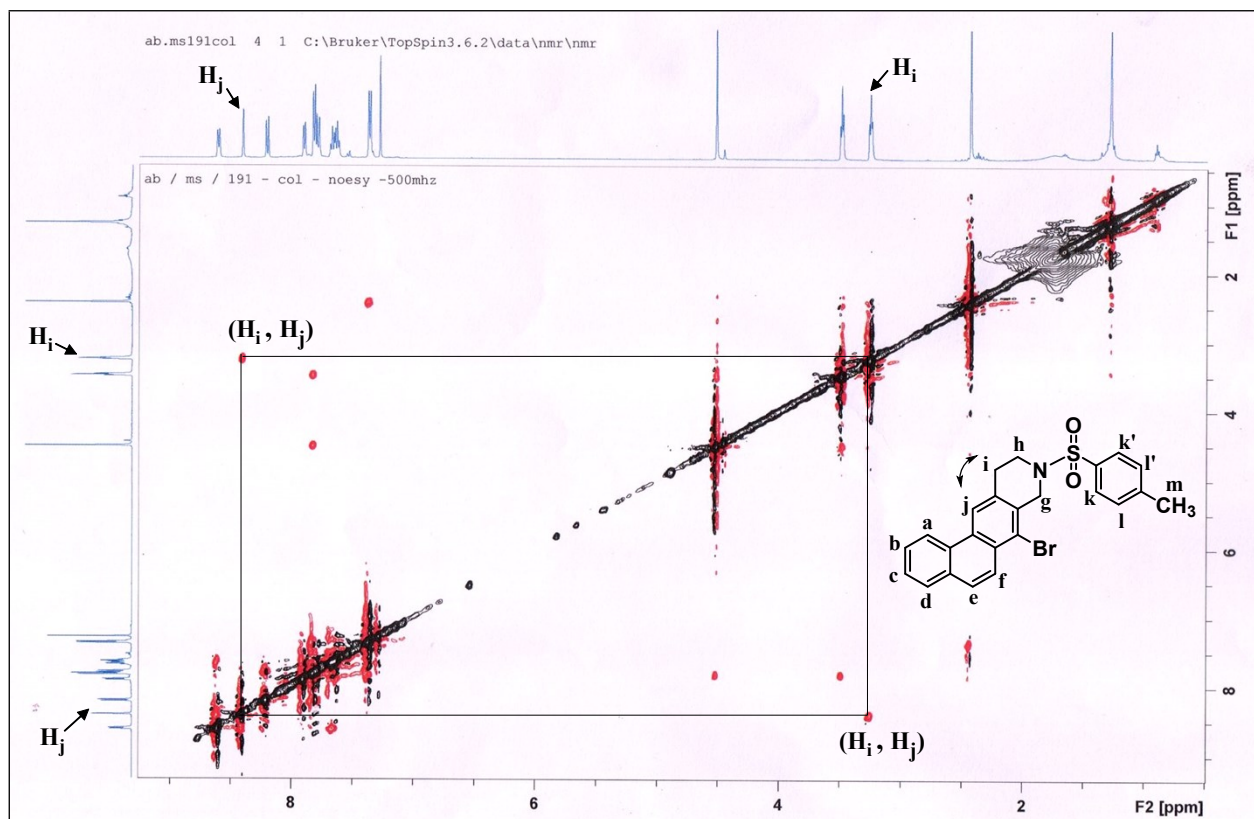

NOESY spectrum of compound **2.1b** in  $\text{CDCl}_3$

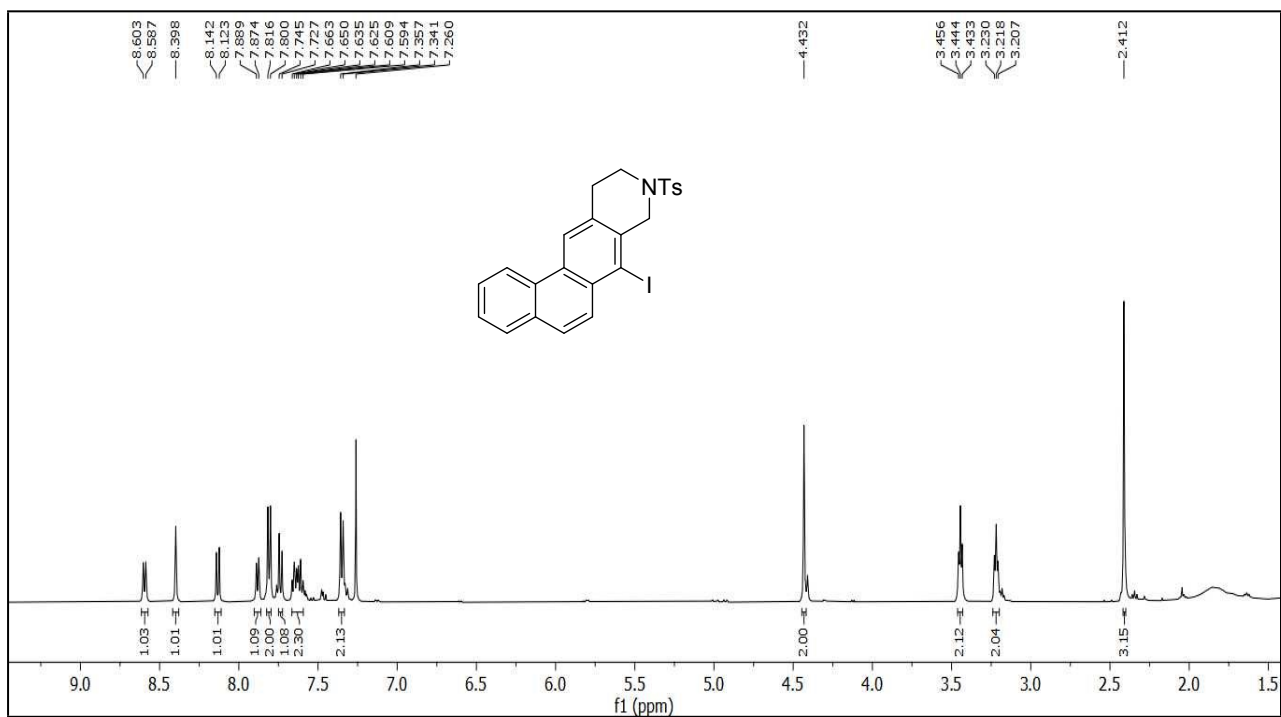

$^1\text{H}$  NMR spectrum (500 MHz,  $\text{CDCl}_3$ ) of the compound **2.2b**

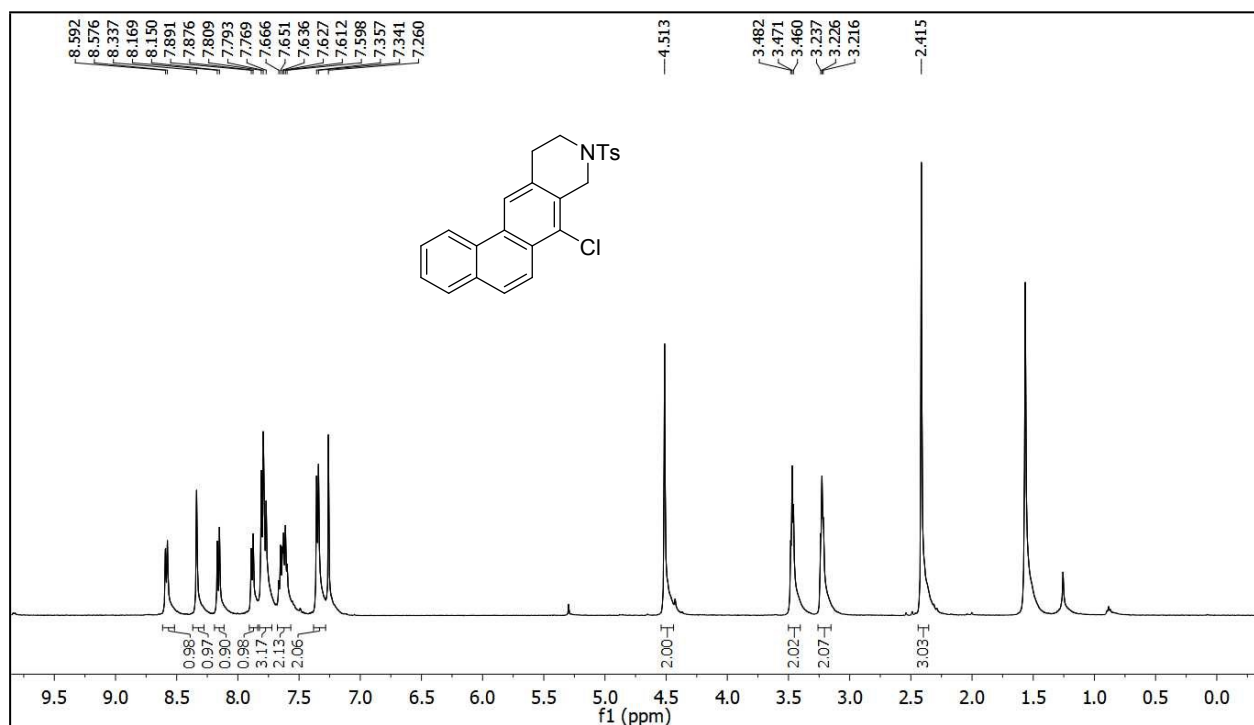

$^1\text{H}$  NMR spectrum (500 MHz,  $\text{CDCl}_3$ ) of the compound **2.3b**

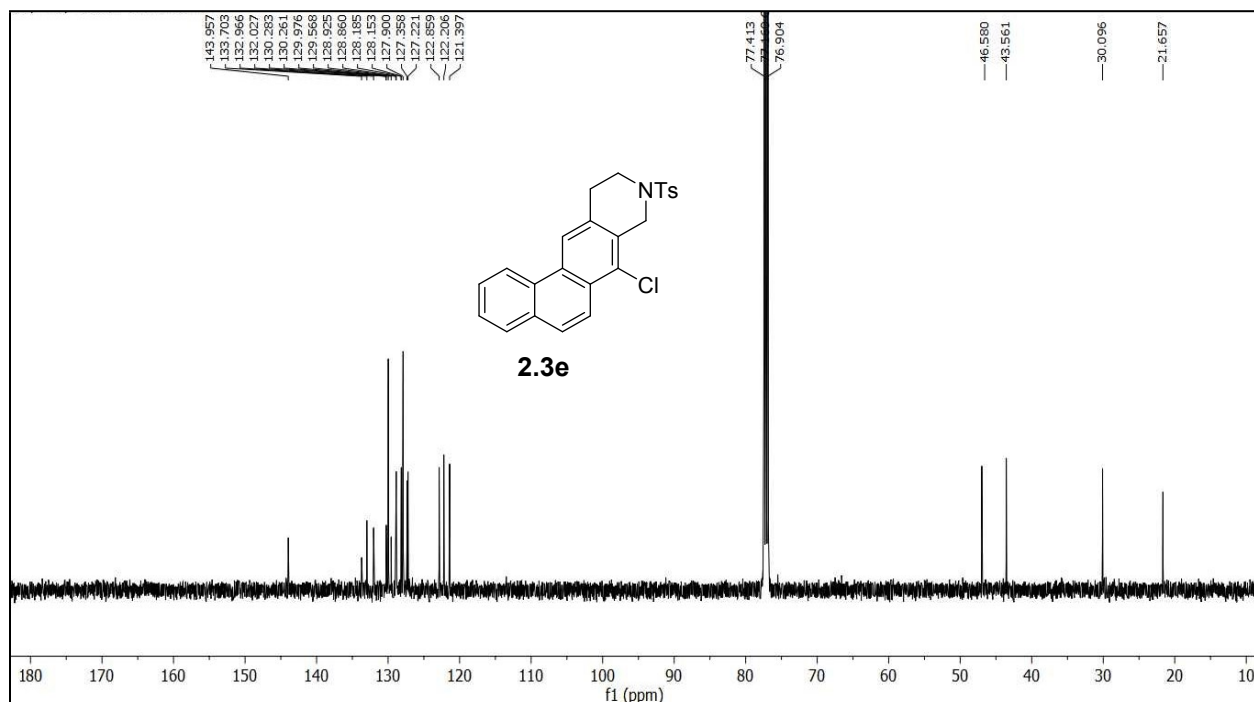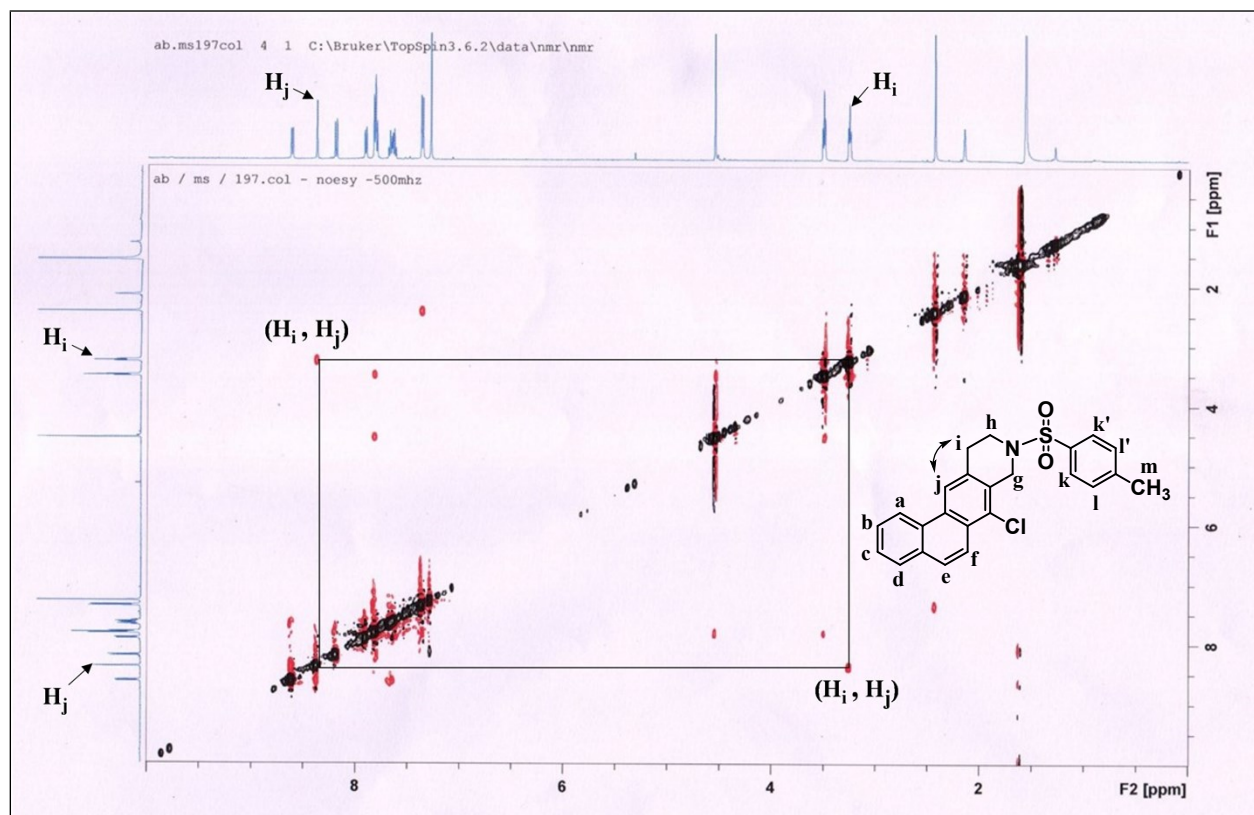

## NMR Spectra of intermediated compounds

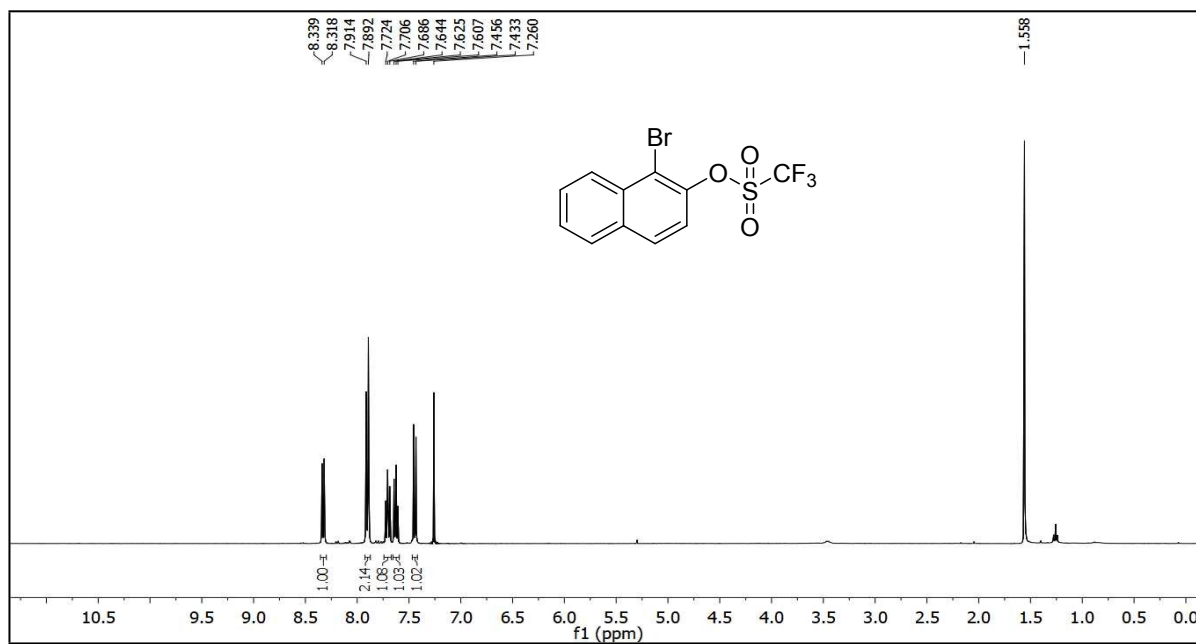

$^1\text{H}$  NMR spectrum (400 MHz,  $\text{CDCl}_3$ ) of the compound 4

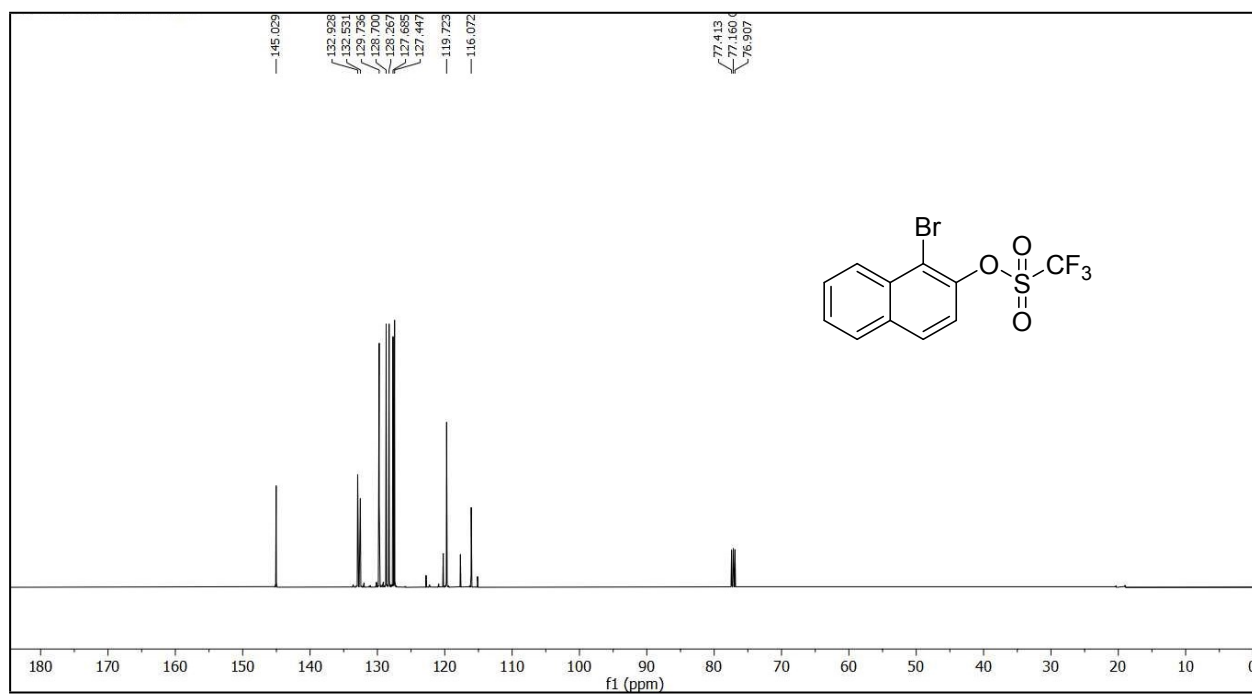

$^{13}\text{C}$  NMR spectrum (125 MHz,  $\text{CDCl}_3$ ) of the compound 4

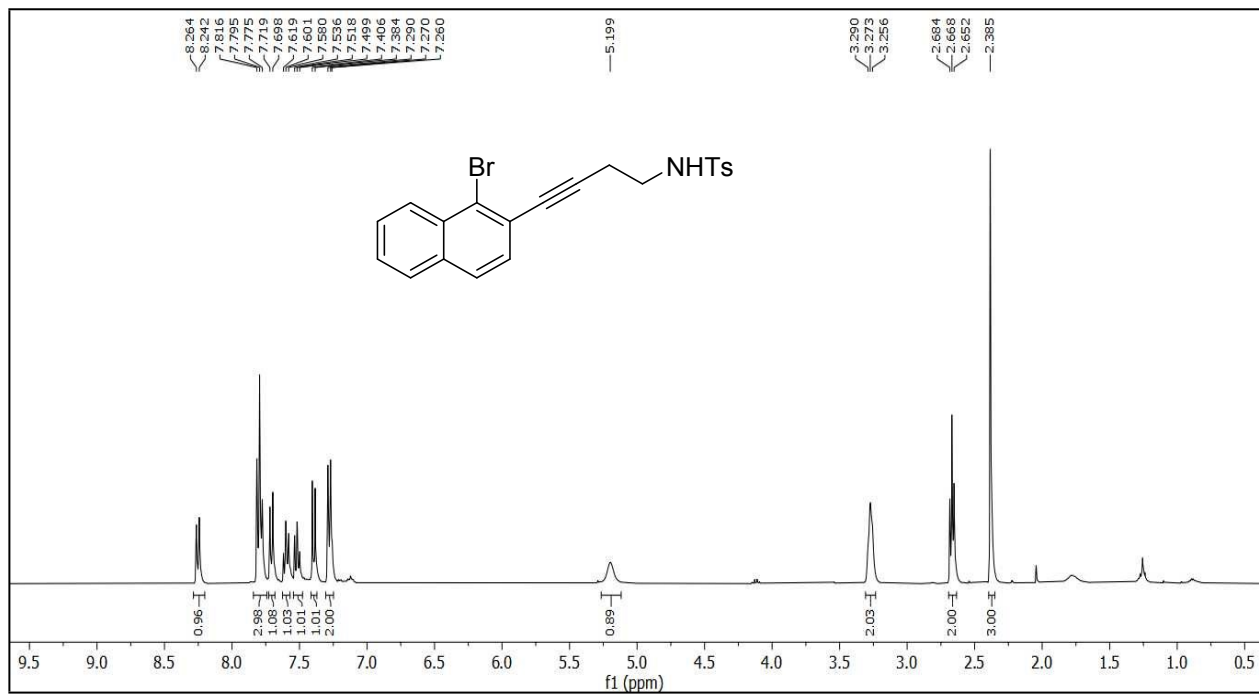

<sup>1</sup>H NMR spectrum (400 MHz, CDCl<sub>3</sub>) of the compound **5a**

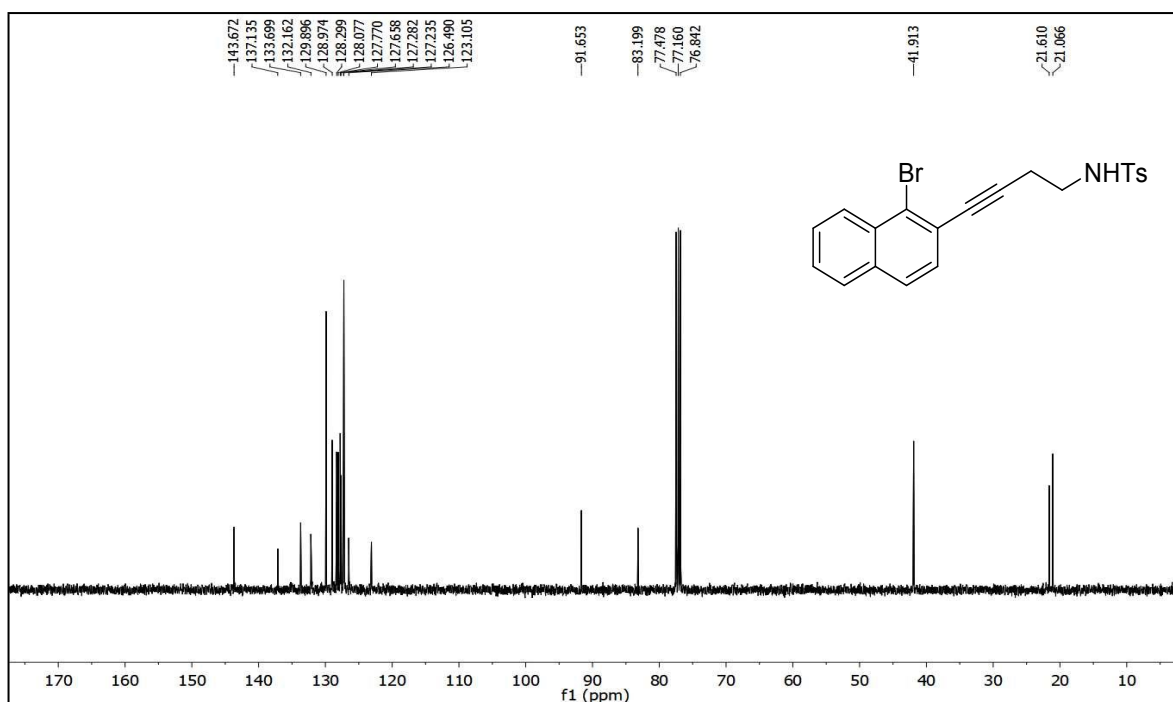

<sup>13</sup>C NMR spectrum (100 MHz, CDCl<sub>3</sub>) of the compound **5a**

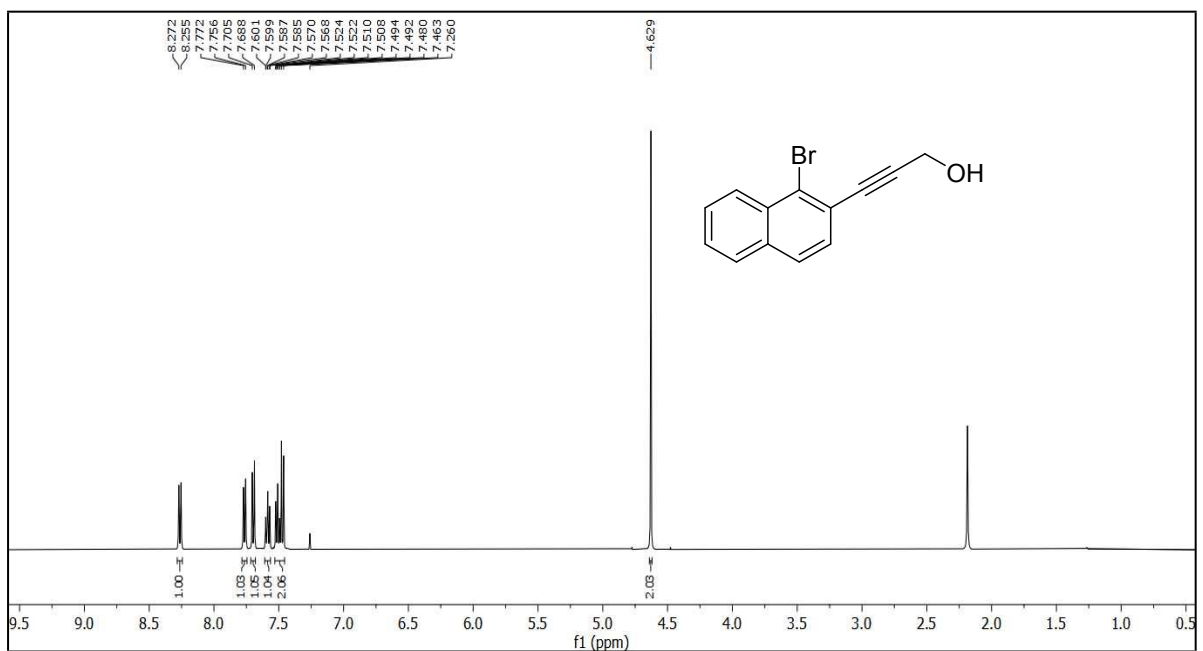

$^1\text{H}$  NMR spectrum (400 MHz,  $\text{CDCl}_3$ ) of the compound **5b**

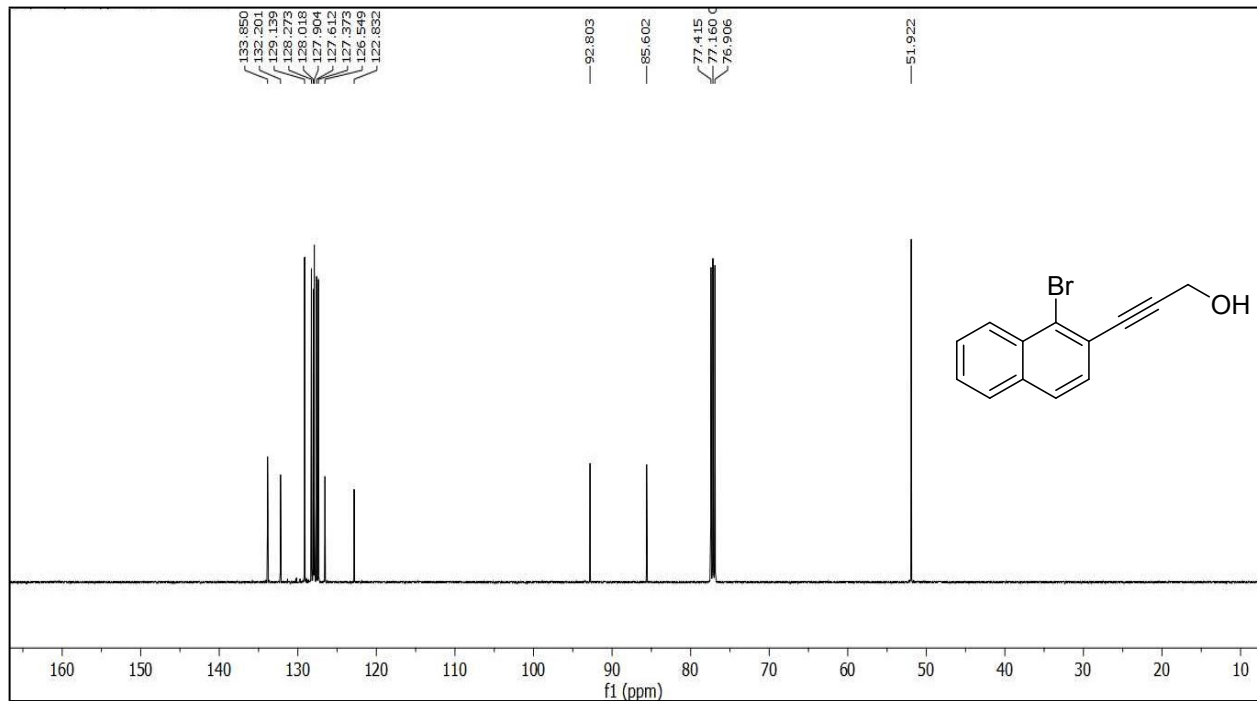

$^{13}\text{C}$  NMR spectrum (125 MHz,  $\text{CDCl}_3$ ) of the compound **5b**



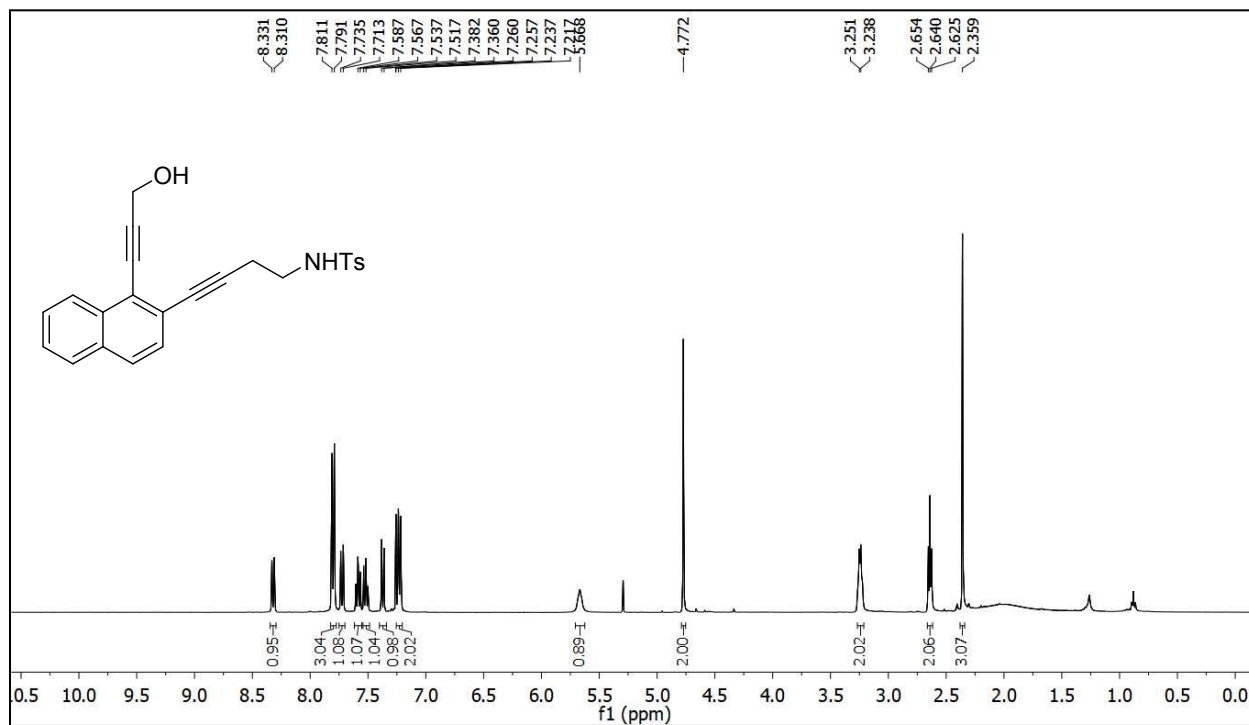

<sup>1</sup>H NMR spectrum (400 MHz, CDCl<sub>3</sub>) of the compound **6a**

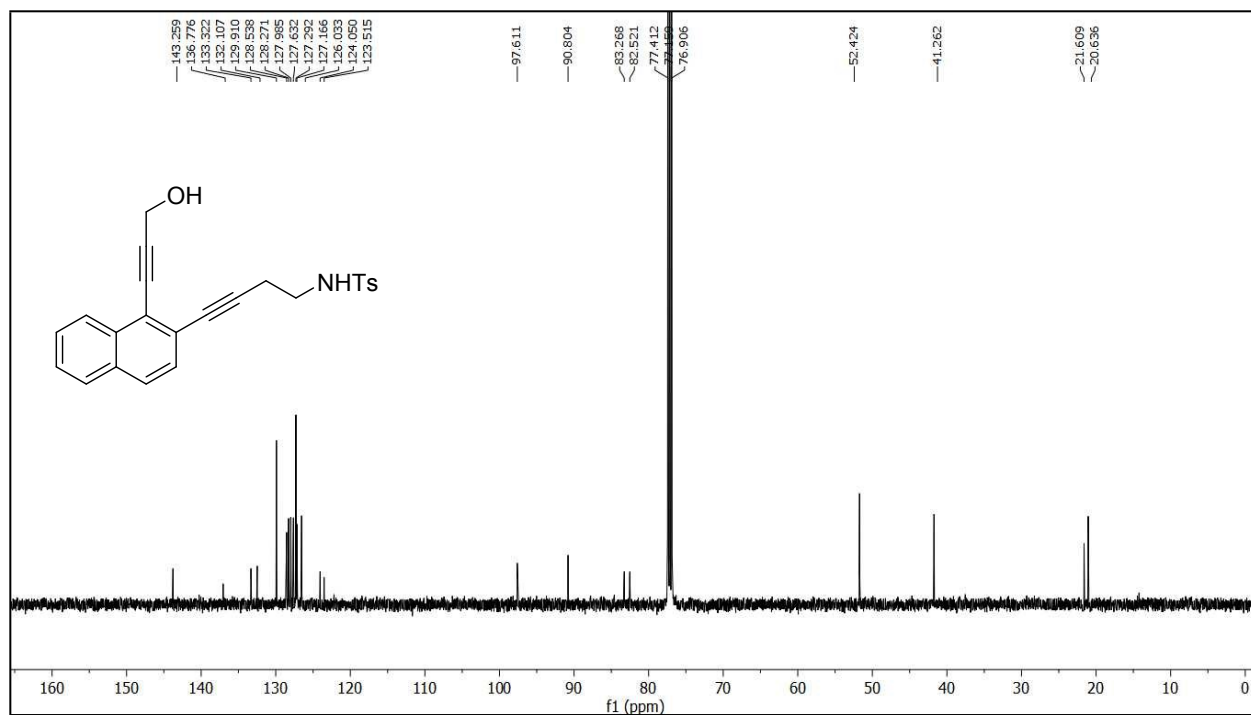

<sup>13</sup>C NMR spectrum (125 MHz, CDCl<sub>3</sub>) of the compound **6a**

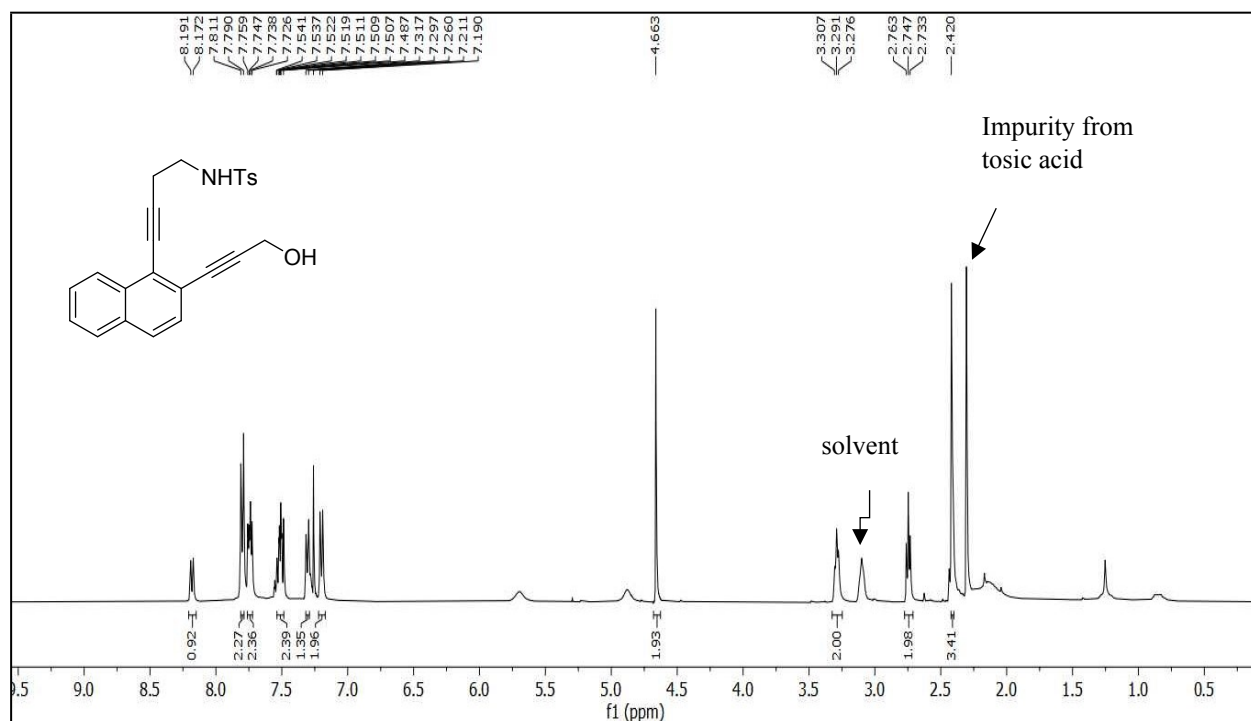

**<sup>1</sup>H NMR spectra of crude reaction mixture showing the ratio of the regioisomeric products.**

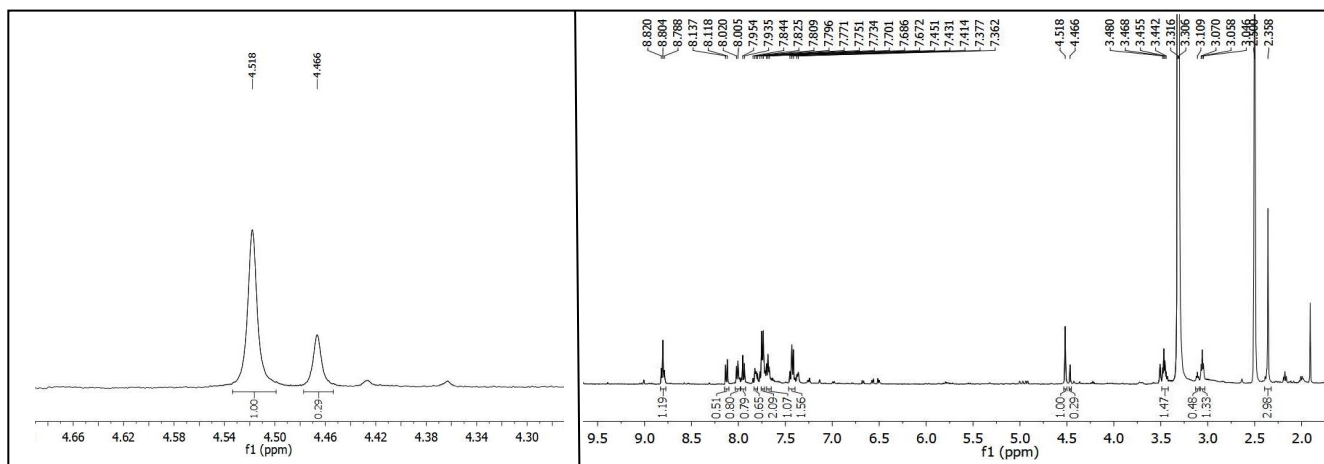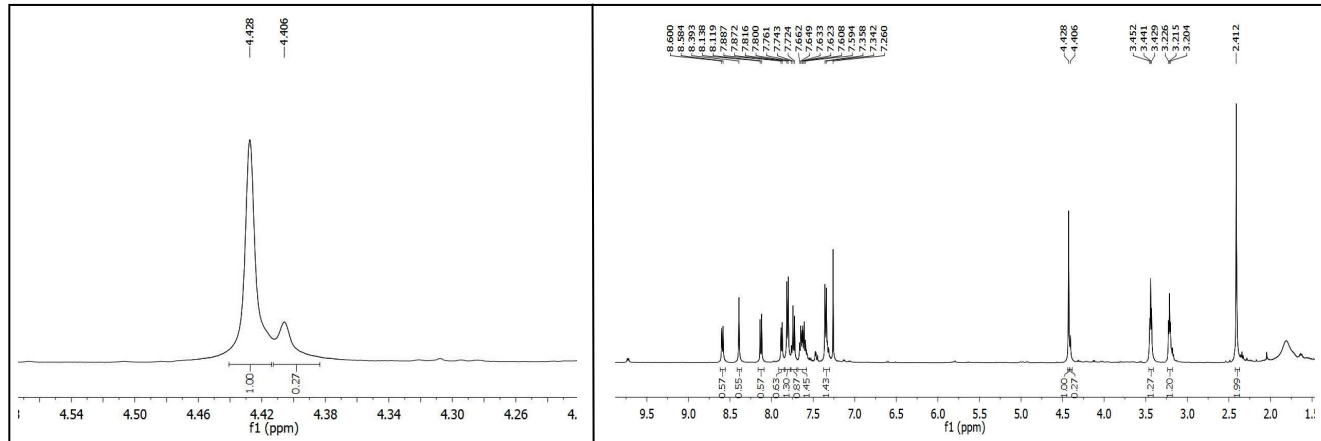

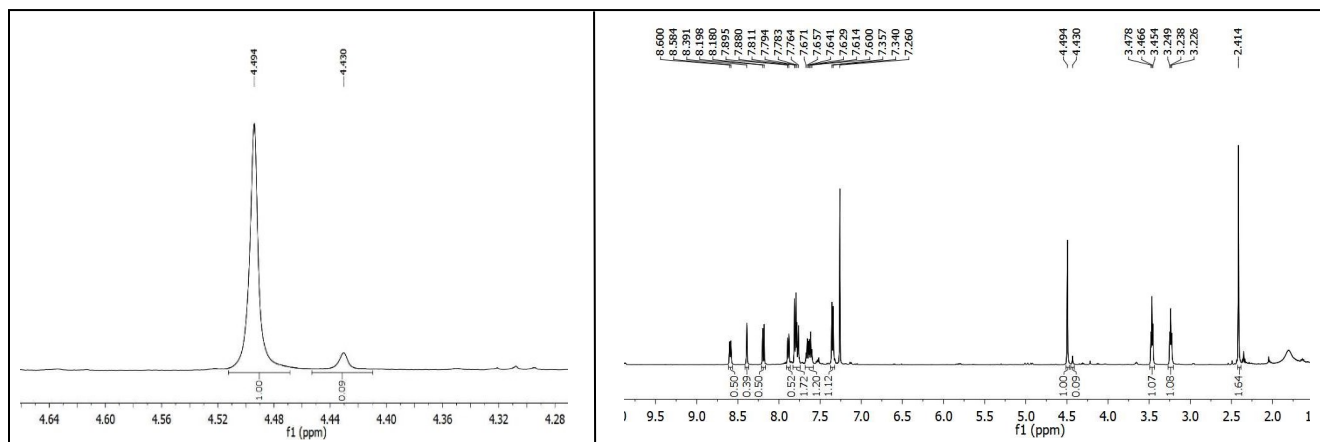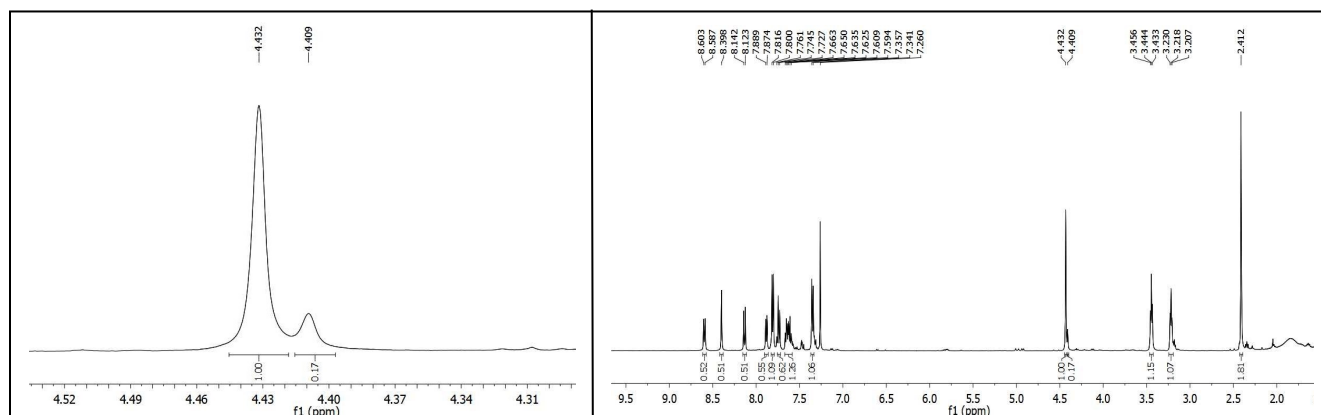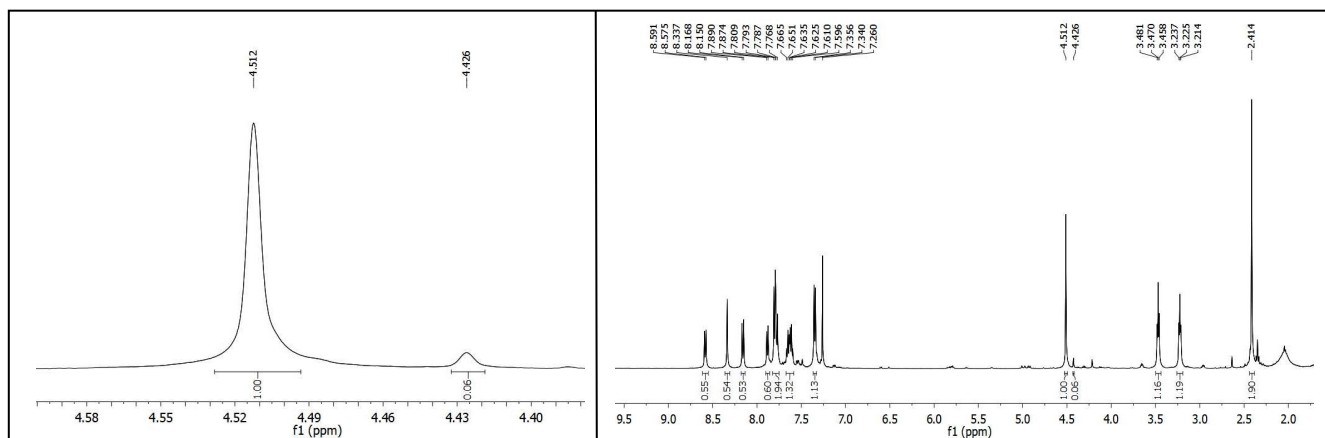

**ORTEP diagram of some halogenated products with 50% probability ellipsoids**

**Sample preparation:** In a 4/5 mg of respective compounds dissolved in distilled dichloromethane (~1 ml), 3-4 drops of HPLC grade hexane was added, swirled and then the solution was kept undisturbed until crystal growth occurred.

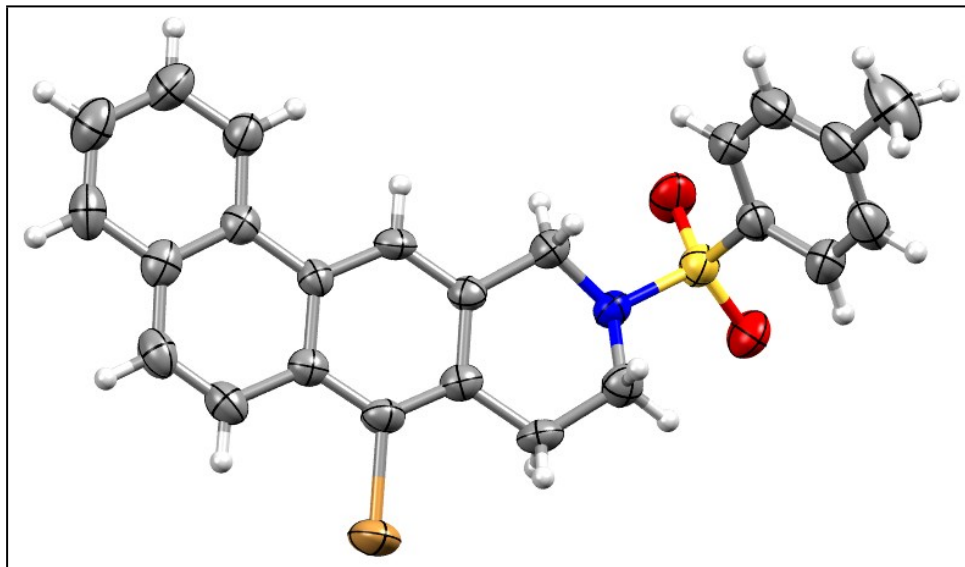

**Compound 2.1a (CCDC: 2062240)**

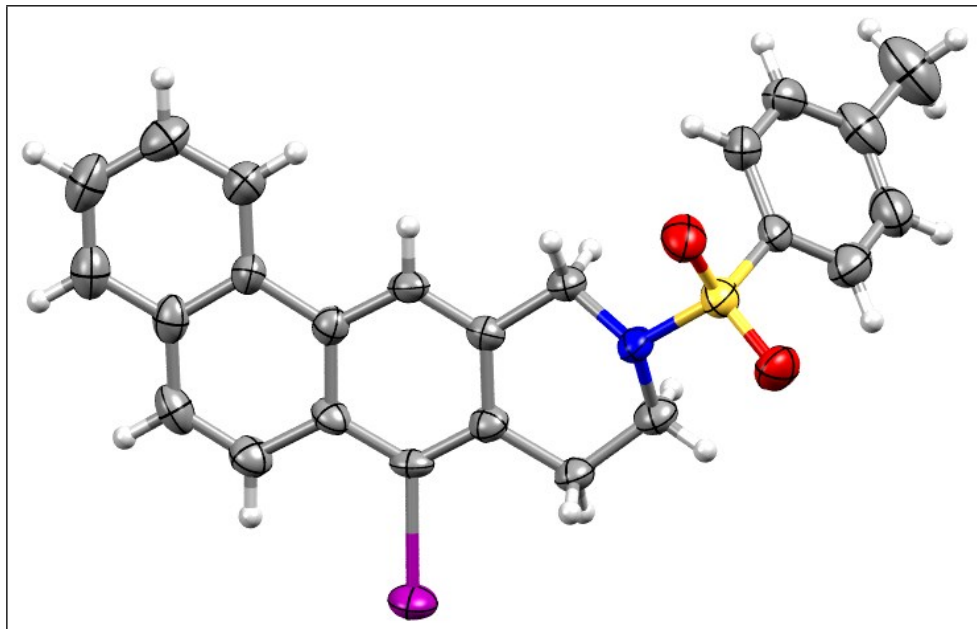

**Compound 2.2a (CCDC: 2062241)**

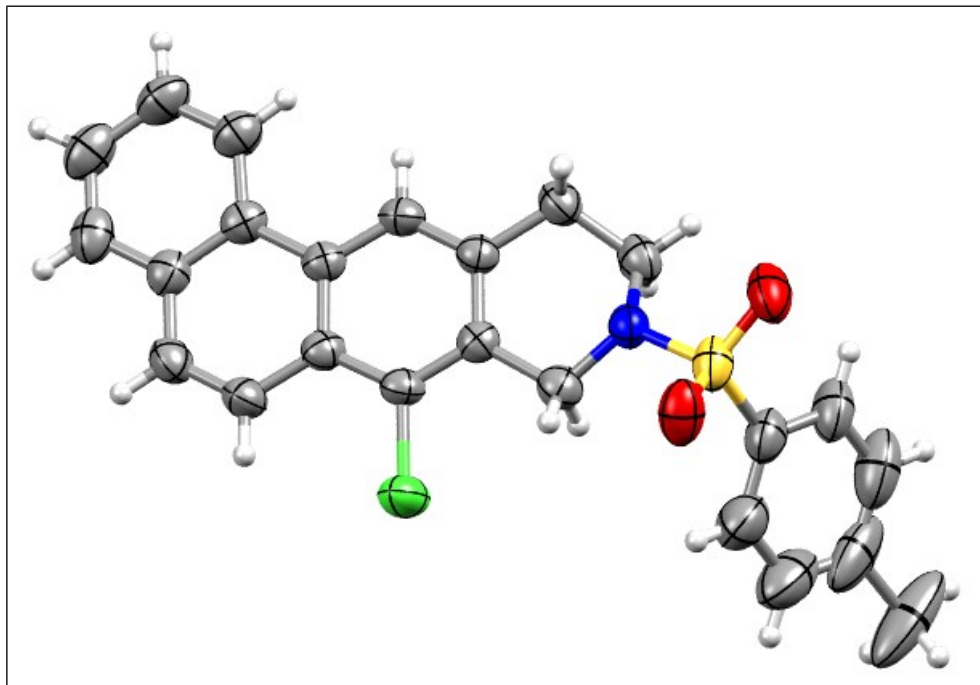

**Compound 2.3b (CCDC: 2062245)**

### X-Ray Crystallographic Data

**Table 1: Crystallographic data for Compound 2.1a (CCDC: 2062240)**

|                                                  |                                                       |
|--------------------------------------------------|-------------------------------------------------------|
| Empirical formula                                | C <sub>24</sub> H <sub>20</sub> Br N O <sub>2</sub> S |
| Formula weight                                   | 466.38                                                |
| Temperature(K)                                   | 296(2)                                                |
| Radiation                                        | Mo-K $\alpha$                                         |
| Wavelength( $\lambda$ )                          | 0.71073                                               |
| Crystal system                                   | monoclinic                                            |
| Space group                                      | P 21/c                                                |
| a[ $\text{\AA}$ ]                                | 16.51(5)                                              |
| b[ $\text{\AA}$ ]                                | 7.40(2)                                               |
| c[ $\text{\AA}$ ]                                | 16.74(5)                                              |
| $\alpha$ [ $^\circ$ ]                            | 90                                                    |
| $\beta$ [ $^\circ$ ]                             | 96.00(6)                                              |
| $\gamma$ [ $^\circ$ ]                            | 90                                                    |
| Volume[ $\text{\AA}^3$ ]                         | 2034(11)                                              |
| Z                                                | 4                                                     |
| Density (calculated) [g/cm <sup>3</sup> ]        | 1.523                                                 |
| Absorption coefficient [ $\mu(\text{mm}^{-1})$ ] | 2.144                                                 |
| F(000)                                           | 952                                                   |
| R <sub>int</sub>                                 | 0.1112                                                |
| GOF                                              | 1.029                                                 |
| Final R indices[I > 2 $\sigma$ (I)]              | R <sub>1</sub> = 0.0483, wR <sub>2</sub> = 0.0968     |
| R indices (all data)                             | R <sub>1</sub> = 0.1201, wR <sub>2</sub> = 0.1342     |

**Table 2: Crystallographic data for Compound 2.2a (CCDC: 2062241)**

|                                                  |                                                      |
|--------------------------------------------------|------------------------------------------------------|
| Empirical formula                                | C <sub>24</sub> H <sub>20</sub> I N O <sub>2</sub> S |
| Formula weight                                   | 513.37                                               |
| Temperature(K)                                   | 296(2)                                               |
| Radiation                                        | Mo-K $\alpha$                                        |
| Wavelength( $\lambda$ )                          | 0.71073                                              |
| Crystal system                                   | monoclinic                                           |
| Space group                                      | P 21/c                                               |
| a[ $\text{\AA}$ ]                                | 16.227(5)                                            |
| b[ $\text{\AA}$ ]                                | 7.418(2)                                             |
| c[ $\text{\AA}$ ]                                | 17.261(3)                                            |
| $\alpha$ [ $^\circ$ ]                            | 90                                                   |
| $\beta$ [ $^\circ$ ]                             | 96.413(18)                                           |
| $\gamma$ [ $^\circ$ ]                            | 90                                                   |
| Volume[ $\text{\AA}^3$ ]                         | 2064.8(10)                                           |
| Z                                                | 4                                                    |
| Density (calculated) [g/cm <sup>3</sup> ]        | 1.651                                                |
| Absorption coefficient [ $\mu(\text{mm}^{-1})$ ] | 1.673                                                |
| F(000)                                           | 364                                                  |
| R <sub>int</sub>                                 | 0.0956                                               |
| GOF                                              | 0.967                                                |
| Final R indices[I > 2 $\sigma$ (I)]              | R <sub>1</sub> = 0.0567, wR <sub>2</sub> = 0.1456    |
| R indices (all data)                             | R <sub>1</sub> = 0.1224, wR <sub>2</sub> = 0.1966    |



**Table 3: Crystallographic data for Compound 2.3b (CCDC: 2062245)**

|                                                     |                                                       |
|-----------------------------------------------------|-------------------------------------------------------|
| Empirical formula                                   | C <sub>24</sub> H <sub>20</sub> Cl N O <sub>2</sub> S |
| Formula weight                                      | 421.92                                                |
| Temperature(K)                                      | 296(2)                                                |
| Radiation                                           | Mo-K $\alpha$                                         |
| Wavelength( $\lambda$ )                             | 0.71073                                               |
| Crystal system                                      | monoclinic                                            |
| Space group                                         | P 2 <sub>1</sub> /c                                   |
| a[Å]                                                | 8.0989(18)                                            |
| b[Å]                                                | 34.797(10)                                            |
| c[Å]                                                | 7.6810(18)                                            |
| $\alpha$ [°]                                        | 90                                                    |
| $\beta$ [°]                                         | 107.300(16)                                           |
| $\gamma$ [°]                                        | 90                                                    |
| Volume[Å <sup>3</sup> ]                             | 2066.7(9)                                             |
| Z                                                   | 4                                                     |
| Density (calculated) [g/cm <sup>3</sup> ]           | 1.356                                                 |
| Absorption coefficient [ $\mu$ (mm <sup>-1</sup> )] | 0.306                                                 |
| F(000)                                              | 880                                                   |
| R <sub>int</sub>                                    | 0.1011                                                |
| GOF                                                 | 1.005                                                 |
| Final R indices[I>2 $\sigma$ (I)]                   | R <sub>1</sub> = 0.0686, wR <sub>2</sub> = 0.1659     |
| R indices (all data)                                | R <sub>1</sub> = 0.1518, wR <sub>2</sub> = 0.2188     |

## Coordinates and energies of the geometry optimized diradicals

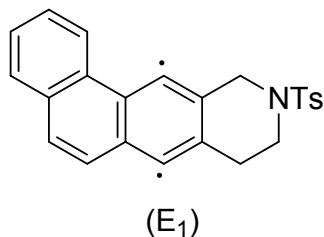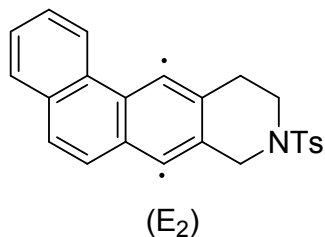

For *p*-benzyne E<sub>1</sub>

-----  
**TOTAL SCF ENERGY**  
-----

**Total Energy:**    -1520.30269459 Eh      -41369.53951 eV

Components

|                      |                   |                  |
|----------------------|-------------------|------------------|
| Nuclear Repulsion:   | 2554.92220037 Eh  | 69522.96755 eV   |
| Electronic Energy:   | -4075.22489497 Eh | -110892.50706 eV |
| One Electron Energy: | -7155.48581043 Eh | -194710.66780 eV |
| Two Electron Energy: | 3080.26091546 Eh  | 83818.16074 eV   |

Virial components

|                   |                   |                 |
|-------------------|-------------------|-----------------|
| Potential Energy: | -3035.63069473 Eh | -82603.71070 eV |
| Kinetic Energy:   | 1515.32800013 Eh  | 41234.17119 eV  |
| Virial Ratio:     | 2.00328292        |                 |

| ----- Geometry convergence ----- |               |                     |           |
|----------------------------------|---------------|---------------------|-----------|
| Item                             | value         | Tolerance           | Converged |
| Energy change                    | -0.0000018576 | 0.0000050000        | YES       |
| <b>RMS</b> gradient              | 0.0000270685  | 0.0001000000        | YES       |
| <b>MAX</b> gradient              | 0.0002032672  | 0.0003000000        | YES       |
| <b>RMS</b> step                  | 0.0003617529  | 0.0020000000        | YES       |
| <b>MAX</b> step                  | 0.0014393394  | 0.0040000000        | YES       |
| .....                            |               |                     |           |
| <b>Max</b> (Bonds)               | 0.0001        | <b>Max</b> (Angles) | 0.03      |
| <b>Max</b> (Dihed)               | 0.08          | <b>Max</b> (Improp) | 0.00      |

\*\*\*\*\*HURRAY\*\*\*\*\*  
 \*\*\* THE OPTIMIZATION HAS CONVERGED \*\*\*  
 \*\*\*\*\*

--- Optimized Parameters ---

-----  
**CARTESIAN COORDINATES (Å)**  
 -----

C -3.56984359455764 -1.09155719506711 -1.54014097548725  
 C -4.09095381703151 -2.29656926020782 -2.06668916276223  
 C -3.32811728305579 -3.42553868115112 -2.05784187557960  
 C -2.01459909521009 -3.40441215070056 -1.51934291799843  
 C -1.49568325931844 -2.20417097008289 -0.98933109101508  
 C -2.31116698702916 -1.04324789462843 -1.01468813048402  
 C -1.20599787918463 -4.57895052241876 -1.50504141415562  
 C 0.03243334955531 -4.59444321920674 -0.94573524585191  
 C 0.55739755527303 -3.40270291157973 -0.38036817810816  
 C -0.15747477098168 -2.18640305802333 -0.44454465702276  
 C 1.80115908246702 -3.34795329778676 0.30563950172999  
 C 2.63394253182097 -2.24011884804099 0.28708239235599

|   |                   |                   |                   |
|---|-------------------|-------------------|-------------------|
| C | 1.85668054618371  | -1.09068819522605 | 0.38237647223441  |
| C | 0.53112883948460  | -0.97177253110679 | -0.15493132021845 |
| C | 4.11623983387664  | -2.24313766203592 | 0.54855304247799  |
| C | 4.65047315312404  | -0.82383627581621 | 0.63887251544378  |
| N | 3.77901127934618  | -0.06478393774446 | 1.52165167105307  |
| C | 2.42367361722845  | 0.14875347186266  | 1.04126319794750  |
| C | 4.84459098488245  | 2.44982985361131  | 1.75905124422063  |
| C | 6.11671519728869  | 2.59051049508787  | 1.22096722587744  |
| C | 6.44244549662459  | 3.74618084237125  | 0.52764274641334  |
| C | 5.51698049946419  | 4.77578012611390  | 0.37048534017528  |
| C | 4.24920121639378  | 4.61992459717908  | 0.93185058264927  |
| C | 3.91075347466885  | 3.47153603760798  | 1.62723509030025  |
| C | 5.88336914400912  | 6.04623910519208  | -0.35627665628911 |
| S | 4.41058846761489  | 0.96593864445912  | 2.62304665169341  |
| O | 3.35603192844780  | 1.29612332607438  | 3.52775002167629  |
| O | 5.62531364709310  | 0.37396625835675  | 3.08870516607248  |
| H | -4.17832260918838 | -0.19672860620425 | -1.55800622259435 |
| H | -5.09209824168289 | -2.31640769446503 | -2.47632732186588 |
| H | -3.71551856790287 | -4.35306891698686 | -2.45934967644386 |
| H | -1.90560816573299 | -0.12490071986796 | -0.61970162588277 |
| H | -1.60941537877011 | -5.48824131174652 | -1.93210331831008 |
| H | 0.61450201107332  | -5.50372079542046 | -0.90963513897086 |
| H | 4.30302914224289  | -2.76927526037423 | 1.48533720305322  |
| H | 4.63234601357516  | -2.79237093606409 | -0.24245723948624 |
| H | 5.65530350351750  | -0.83427792420423 | 1.04584385516944  |

|   |                  |                   |                   |
|---|------------------|-------------------|-------------------|
| H | 4.68593156250778 | -0.35830010952670 | -0.35215389616884 |
| H | 1.79331267019569 | 0.43195750559946  | 1.87949762971056  |
| H | 2.37382579721165 | 0.95546538473843  | 0.30165788085231  |
| H | 6.85108946011853 | 1.81053994946102  | 1.35996527126419  |
| H | 7.43629884233236 | 3.84981736669552  | 0.11195107679369  |
| H | 3.51770671705100 | 5.41155695945282  | 0.83200216934379  |
| H | 2.93478992940425 | 3.37223996078552  | 2.07960228835325  |
| H | 6.73009058565354 | 5.89118676831598  | -1.02377539746797 |
| H | 5.04601102422496 | 6.41725100548091  | -0.94736181611810 |
| H | 6.15843254569017 | 6.82878122723796  | 0.35477304142002  |

-----  
**CARTESIAN COORDINATES (A.U.)**  
 -----

|    | NO | LB     | ZA | FRAG   | MASS      | X         | Y         | Z |
|----|----|--------|----|--------|-----------|-----------|-----------|---|
| 0  | C  | 6.0000 | 0  | 12.011 | -6.746027 | -2.062744 | -2.910445 |   |
| 1  | C  | 6.0000 | 0  | 12.011 | -7.730782 | -4.339887 | -3.905477 |   |
| 2  | C  | 6.0000 | 0  | 12.011 | -6.289230 | -6.473330 | -3.888758 |   |
| 3  | C  | 6.0000 | 0  | 12.011 | -3.807041 | -6.433407 | -2.871142 |   |
| 4  | C  | 6.0000 | 0  | 12.011 | -2.826432 | -4.165279 | -1.869565 |   |
| 5  | C  | 6.0000 | 0  | 12.011 | -4.367473 | -1.971453 | -1.917483 |   |
| 6  | C  | 6.0000 | 0  | 12.011 | -2.279006 | -8.652962 | -2.844116 |   |
| 7  | C  | 6.0000 | 0  | 12.011 | 0.061290  | -8.682239 | -1.787181 |   |
| 8  | C  | 6.0000 | 0  | 12.011 | 1.053329  | -6.430177 | -0.718792 |   |
| 9  | C  | 6.0000 | 0  | 12.011 | -0.297584 | -4.131703 | -0.840068 |   |
| 10 | C  | 6.0000 | 0  | 12.011 | 3.403697  | -6.326715 | 0.577575  |   |

|      |         |   |        |           |            |           |
|------|---------|---|--------|-----------|------------|-----------|
| 11 C | 6.0000  | 0 | 12.011 | 4.977430  | -4.233211  | 0.542507  |
| 12 C | 6.0000  | 0 | 12.011 | 3.508618  | -2.061102  | 0.722587  |
| 13 C | 6.0000  | 0 | 12.011 | 1.003688  | -1.836384  | -0.292778 |
| 14 C | 6.0000  | 0 | 12.011 | 7.778566  | -4.238916  | 1.036615  |
| 15 C | 6.0000  | 0 | 12.011 | 8.788121  | -1.556825  | 1.207294  |
| 16 N | 7.0000  | 0 | 14.007 | 7.141296  | -0.122424  | 2.875505  |
| 17 C | 6.0000  | 0 | 12.011 | 4.580079  | 0.281103   | 1.967702  |
| 18 C | 6.0000  | 0 | 12.011 | 9.154950  | 4.629507   | 3.324125  |
| 19 C | 6.0000  | 0 | 12.011 | 11.558917 | 4.895355   | 2.307294  |
| 20 C | 6.0000  | 0 | 12.011 | 12.174458 | 7.079256   | 0.997100  |
| 21 C | 6.0000  | 0 | 12.011 | 10.425582 | 9.024917   | 0.700116  |
| 22 C | 6.0000  | 0 | 12.011 | 8.029827  | 8.730392   | 1.760942  |
| 23 C | 6.0000  | 0 | 12.011 | 7.390253  | 6.560252   | 3.075029  |
| 24 C | 6.0000  | 0 | 12.011 | 11.117956 | 11.425736  | -0.673265 |
| 25 S | 16.0000 | 0 | 32.060 | 8.334804  | 1.825360   | 4.956840  |
| 26 O | 8.0000  | 0 | 15.999 | 6.341981  | 2.449318   | 6.666481  |
| 27 O | 8.0000  | 0 | 15.999 | 10.630302 | 0.706694   | 5.836807  |
| 28 H | 1.0000  | 0 | 1.008  | -7.895885 | -0.371763  | -2.944205 |
| 29 H | 1.0000  | 0 | 1.008  | -9.622671 | -4.377376  | -4.679580 |
| 30 H | 1.0000  | 0 | 1.008  | -7.021313 | -8.226108  | -4.647497 |
| 31 H | 1.0000  | 0 | 1.008  | -3.601078 | -0.236028  | -1.171066 |
| 32 H | 1.0000  | 0 | 1.008  | -3.041354 | -10.371273 | -3.651146 |
| 33 H | 1.0000  | 0 | 1.008  | 1.161241  | -10.400525 | -1.718961 |
| 34 H | 1.0000  | 0 | 1.008  | 8.131547  | -5.233172  | 2.806881  |
| 35 H | 1.0000  | 0 | 1.008  | 8.753865  | -5.276816  | -0.458178 |

|      |        |   |       |           |           |           |
|------|--------|---|-------|-----------|-----------|-----------|
| 36 H | 1.0000 | 0 | 1.008 | 10.686975 | -1.576557 | 1.976358  |
| 37 H | 1.0000 | 0 | 1.008 | 8.855127  | -0.677089 | -0.665474 |
| 38 H | 1.0000 | 0 | 1.008 | 3.388870  | 0.816281  | 3.551736  |
| 39 H | 1.0000 | 0 | 1.008 | 4.485881  | 1.805568  | 0.570051  |
| 40 H | 1.0000 | 0 | 1.008 | 12.946683 | 3.421425  | 2.569962  |
| 41 H | 1.0000 | 0 | 1.008 | 14.052568 | 7.275100  | 0.211557  |
| 42 H | 1.0000 | 0 | 1.008 | 6.647502  | 10.226361 | 1.572256  |
| 43 H | 1.0000 | 0 | 1.008 | 5.545949  | 6.372610  | 3.929879  |
| 44 H | 1.0000 | 0 | 1.008 | 12.718028 | 11.132730 | -1.934655 |
| 45 H | 1.0000 | 0 | 1.008 | 9.535579  | 12.126847 | -1.790254 |
| 46 H | 1.0000 | 0 | 1.008 | 11.637751 | 12.904526 | 0.670424  |

-----  
**INTERNAL COORDINATES (Å)**  
 -----

|   |   |   |   |                |              |              |
|---|---|---|---|----------------|--------------|--------------|
| C | 0 | 0 | 0 | 0.000000000000 | 0.00000000   | 0.00000000   |
| C | 1 | 0 | 0 | 1.414518622933 | 0.00000000   | 0.00000000   |
| C | 2 | 1 | 0 | 1.362560019039 | 119.81337365 | 0.00000000   |
| C | 3 | 2 | 1 | 1.419773745146 | 120.53665188 | 0.24065964   |
| C | 4 | 3 | 2 | 1.410944744890 | 119.69536659 | 0.00000000   |
| C | 1 | 2 | 3 | 1.364808148851 | 120.87867872 | 359.66905637 |
| C | 4 | 3 | 2 | 1.426036761871 | 121.07359239 | 180.04125891 |
| C | 7 | 4 | 3 | 1.358961118603 | 122.02256023 | 182.73181170 |
| C | 8 | 7 | 4 | 1.419673307278 | 119.42696330 | 358.66542018 |
| C | 9 | 8 | 7 | 1.412284106351 | 121.17705283 | 356.98000627 |

|   |    |    |    |                |              |              |
|---|----|----|----|----------------|--------------|--------------|
| C | 9  | 8  | 7  | 1.421459388634 | 123.23518725 | 175.52532414 |
| C | 11 | 9  | 8  | 1.386062699833 | 123.36978794 | 147.07233401 |
| C | 12 | 11 | 9  | 1.390829961429 | 108.89619425 | 40.34325937  |
| C | 10 | 9  | 8  | 1.425965684762 | 118.68047069 | 194.69885507 |
| C | 12 | 11 | 9  | 1.505184807854 | 125.99834526 | 202.95527285 |
| C | 15 | 12 | 11 | 1.519203499047 | 110.77875150 | 188.19933834 |
| N | 16 | 15 | 12 | 1.454271393846 | 108.23931533 | 47.77487213  |
| C | 17 | 16 | 15 | 1.453723319187 | 115.77015994 | 293.88732690 |
| C | 17 | 16 | 15 | 2.741368487794 | 107.36233228 | 177.20098750 |
| C | 19 | 17 | 16 | 1.388389522243 | 114.55307586 | 350.18803208 |
| C | 20 | 19 | 17 | 1.386496669062 | 119.57192848 | 140.16950130 |
| C | 21 | 20 | 19 | 1.393290564236 | 121.08445298 | 0.53253726   |
| C | 22 | 21 | 20 | 1.395236966232 | 118.39981480 | 0.16758008   |
| C | 23 | 22 | 21 | 1.384522578766 | 121.12140408 | 359.86550295 |
| C | 22 | 21 | 20 | 1.508804048204 | 121.01543919 | 178.54841663 |
| S | 17 | 16 | 15 | 1.635343905601 | 120.42231587 | 137.74617684 |
| O | 26 | 17 | 16 | 1.428145512870 | 106.68969388 | 193.76282723 |
| O | 26 | 17 | 16 | 1.429274787989 | 106.65505399 | 324.53055598 |
| H | 1  | 2  | 3  | 1.082258786865 | 119.41182789 | 179.49005823 |
| H | 2  | 1  | 3  | 1.081890541542 | 119.83280098 | 180.14093016 |
| H | 3  | 2  | 1  | 1.082405011096 | 120.47918872 | 180.09485563 |
| H | 6  | 1  | 2  | 1.078820573468 | 121.18383633 | 179.45630199 |
| H | 7  | 4  | 3  | 1.082560524178 | 118.46037311 | 1.11189889   |
| H | 8  | 7  | 4  | 1.080228149533 | 120.95722781 | 177.55494550 |
| H | 15 | 12 | 11 | 1.090539124291 | 108.59437568 | 308.90919551 |



|   |    |    |    |                |              |              |
|---|----|----|----|----------------|--------------|--------------|
| H | 15 | 12 | 11 | 1.092574960447 | 109.90338735 | 66.08520930  |
| H | 16 | 15 | 12 | 1.084167299106 | 109.83054653 | 167.18527413 |
| H | 16 | 15 | 12 | 1.095497407315 | 110.76949389 | 286.74896036 |
| H | 18 | 17 | 16 | 1.086368450785 | 108.92271858 | 162.21388419 |
| H | 18 | 17 | 16 | 1.095575164291 | 111.94179419 | 281.08870262 |
| H | 20 | 19 | 17 | 1.080268515960 | 119.99025864 | 319.00647422 |
| H | 21 | 20 | 19 | 1.082259010653 | 119.18468844 | 179.91861389 |
| H | 23 | 22 | 21 | 1.082467415310 | 119.68477429 | 179.30913693 |
| H | 24 | 23 | 22 | 1.080278035708 | 120.49122910 | 178.41156778 |
| H | 25 | 22 | 21 | 1.089280953834 | 111.35039639 | 22.02050817  |
| H | 25 | 22 | 21 | 1.090045924305 | 111.17696918 | 142.82905433 |
| H | 25 | 22 | 21 | 1.092530878434 | 110.53402334 | 262.27228716 |

-----  
**INTERNAL COORDINATES (A.U.)**  
 -----

|   |   |   |   |                |              |              |
|---|---|---|---|----------------|--------------|--------------|
| C | 0 | 0 | 0 | 0.000000000000 | 0.00000000   | 0.00000000   |
| C | 1 | 0 | 0 | 2.673052808675 | 0.00000000   | 0.00000000   |
| C | 2 | 1 | 0 | 2.574865277014 | 119.81337365 | 0.00000000   |
| C | 3 | 2 | 1 | 2.682983550458 | 120.53665188 | 0.24065964   |
| C | 4 | 3 | 2 | 2.666299157937 | 119.69536659 | 0.00000000   |
| C | 1 | 2 | 3 | 2.579113626673 | 120.87867872 | 359.66905637 |
| C | 4 | 3 | 2 | 2.694818936841 | 121.07359239 | 180.04125891 |
| C | 7 | 4 | 3 | 2.568064340807 | 122.02256023 | 182.73181170 |
| C | 8 | 7 | 4 | 2.682793750393 | 119.42696330 | 358.66542018 |

|   |    |    |    |                |              |              |
|---|----|----|----|----------------|--------------|--------------|
| C | 9  | 8  | 7  | 2.668830184293 | 121.17705283 | 356.98000627 |
| C | 9  | 8  | 7  | 2.686168955009 | 123.23518725 | 175.52532414 |
| C | 11 | 9  | 8  | 2.619278907129 | 123.36978794 | 147.07233401 |
| C | 12 | 11 | 9  | 2.628287725952 | 108.89619425 | 40.34325937  |
| C | 10 | 9  | 8  | 2.694684620570 | 118.68047069 | 194.69885507 |
| C | 12 | 11 | 9  | 2.844387067783 | 125.99834526 | 202.95527285 |
| C | 15 | 12 | 11 | 2.870878554893 | 110.77875150 | 188.19933834 |
| N | 16 | 15 | 12 | 2.748174658765 | 108.23931533 | 47.77487213  |
| C | 17 | 16 | 15 | 2.747138947759 | 115.77015994 | 293.88732690 |
| C | 17 | 16 | 15 | 5.180435674092 | 107.36233228 | 177.20098750 |
| C | 19 | 17 | 16 | 2.623675964244 | 114.55307586 | 350.18803208 |
| C | 20 | 19 | 17 | 2.620098990121 | 119.57192848 | 140.16950130 |
| C | 21 | 20 | 19 | 2.632937591382 | 121.08445298 | 0.53253726   |
| C | 22 | 21 | 20 | 2.636615758101 | 118.39981480 | 0.16758008   |
| C | 23 | 22 | 21 | 2.616368500099 | 121.12140408 | 359.86550295 |
| C | 22 | 21 | 20 | 2.851226440857 | 121.01543919 | 178.54841663 |
| S | 17 | 16 | 15 | 3.090352116363 | 120.42231587 | 137.74617684 |
| O | 26 | 17 | 16 | 2.698803898714 | 106.68969388 | 193.76282723 |
| O | 26 | 17 | 16 | 2.700937919417 | 106.65505399 | 324.53055598 |
| H | 1  | 2  | 3  | 2.045172713205 | 119.41182789 | 179.49005823 |
| H | 2  | 1  | 3  | 2.044476830394 | 119.83280098 | 180.14093016 |
| H | 3  | 2  | 1  | 2.045449036955 | 120.47918872 | 180.09485563 |
| H | 6  | 1  | 2  | 2.038675431495 | 121.18383633 | 179.45630199 |
| H | 7  | 4  | 3  | 2.045742914090 | 118.46037311 | 1.11189889   |
| H | 8  | 7  | 4  | 2.041335364770 | 120.95722781 | 177.55494550 |

|   |    |    |    |                |              |              |
|---|----|----|----|----------------|--------------|--------------|
| H | 15 | 12 | 11 | 2.060820283237 | 108.59437568 | 308.90919551 |
| H | 15 | 12 | 11 | 2.064667456025 | 109.90338735 | 66.08520930  |
| H | 16 | 15 | 12 | 2.048779278664 | 109.83054653 | 167.18527413 |
| H | 16 | 15 | 12 | 2.070190080246 | 110.76949389 | 286.74896036 |
| H | 18 | 17 | 16 | 2.052938852517 | 108.92271858 | 162.21388419 |
| H | 18 | 17 | 16 | 2.070337019636 | 111.94179419 | 281.08870262 |
| H | 20 | 19 | 17 | 2.041411646261 | 119.99025864 | 319.00647422 |
| H | 21 | 20 | 19 | 2.045173136103 | 119.18468844 | 179.91861389 |
| H | 23 | 22 | 21 | 2.045566963829 | 119.68477429 | 179.30913693 |
| H | 24 | 23 | 22 | 2.041429635978 | 120.49122910 | 178.41156778 |
| H | 25 | 22 | 21 | 2.058442685644 | 111.35039639 | 22.02050817  |
| H | 25 | 22 | 21 | 2.059888270334 | 111.17696918 | 142.82905433 |
| H | 25 | 22 | 21 | 2.064584153093 | 110.53402334 | 262.27228716 |

**For *p*-benzyne E<sub>2</sub>**

-----  
**TOTAL SCF ENERGY**  
 -----

**Total Energy:    -1520.30407307 Eh        -41369.57702 eV**

Components

Nuclear Repulsion:    2523.00508519 Eh        68654.45869 eV

Electronic Energy:    -4043.30915826 Eh       -110024.03571 eV

One Electron Energy:    -7091.25956849 Eh       -192962.98291 eV

Two Electron Energy: 3047.95041022 Eh 82938.94720 eV

Virial components

Potential Energy: -3035.61764893 Eh -82603.35570 eV

Kinetic Energy: 1515.31357585 Eh 41233.77868 eV

Virial Ratio: 2.00329338

```
-----|-----  
-----|Geometry convergence|-----  
Item          value          Tolerance          Converged  
-----|-----  
Energy change -0.0000046317      0.0000050000      YES  
RMS gradient  0.0000347094      0.0001000000      YES  
MAX gradient  0.0001732191      0.0003000000      YES  
RMS step      0.0013291810      0.0020000000      YES  
MAX step      0.0067830307      0.0040000000      NO  
.....  
Max (Bonds)   0.0003      Max (Angles)  0.08  
Max (Dihed)   0.39      Max (Improp)  0.00  
-----|-----
```

The energies and gradients are converged  
and the convergence on bond distances, angles, dihedrals and impropers  
is acceptable.

Convergence will therefore be signaled now

```
*****HURRAY*****  
***          THE OPTIMIZATION HAS CONVERGED          ***  
*****
```

--- Optimized Parameters ---

-----  
CARTESIAN COORDINATES (Å)  
-----

|   |                   |                   |                   |
|---|-------------------|-------------------|-------------------|
| C | -3.78168809438171 | -3.83642917073320 | 1.83678882945424  |
| C | -3.59984540278451 | -5.23027234588723 | 1.96971146162278  |
| C | -2.34164227513923 | -5.75670189005744 | 1.92134143047403  |
| C | -1.21577631020811 | -4.91416511082610 | 1.74528653897842  |
| C | -1.39620892393400 | -3.52337471525493 | 1.62606556172863  |
| C | -2.71067929926508 | -3.00244870312694 | 1.67340633992892  |
| C | 0.10745152062889  | -5.44719933939063 | 1.66681549936245  |
| C | 1.20336515309653  | -4.65502433498551 | 1.54224335227120  |
| C | 1.06460825330028  | -3.23824310543034 | 1.49730302995577  |
| C | -0.23947713487834 | -2.66864886390544 | 1.46465248524280  |
| C | 2.22312564997659  | -2.40104856432583 | 1.41593919822298  |
| C | 2.17812675780425  | -1.19832255055768 | 0.74061354844628  |
| C | 0.90808844364887  | -0.61893165419484 | 0.89209843995451  |
| C | -0.28964446689197 | -1.37606288552189 | 0.92226392176080  |
| C | 3.40377321798714  | -0.38806602059358 | 0.39985479035863  |
| C | 2.15835222831425  | 1.54051169126439  | 1.24592004729683  |
| C | 0.80185698225641  | 0.87547156198667  | 1.09215336977381  |
| N | 3.04484532904966  | 1.01566361687806  | 0.21717145397129  |
| C | 3.27582232436981  | 3.11232530907444  | -1.43474120038285 |
| C | 3.21064590459783  | 4.46356397046650  | -1.14209524570825 |
| C | 2.51880922577809  | 5.31395034608899  | -1.99665327486809 |

|   |                   |                   |                   |
|---|-------------------|-------------------|-------------------|
| C | 1.89998591948848  | 4.83002858840347  | -3.14347600888385 |
| C | 1.98654213226198  | 3.46147590002000  | -3.42205761519599 |
| C | 2.67195314302733  | 2.60608410847292  | -2.58271161353184 |
| C | 1.17534782194304  | 5.75723879354772  | -4.08745649549071 |
| S | 4.19367873648338  | 2.02713844433071  | -0.38600312888013 |
| O | 4.75063294003769  | 2.82150039126173  | 0.66737784718647  |
| O | 5.05207582000253  | 1.21799407767515  | -1.19392578368373 |
| H | -4.78247380411879 | -3.42528143552020 | 1.86221862976020  |
| H | -4.45770695169245 | -5.87540889939985 | 2.10416122495797  |
| H | -2.18993102667742 | -6.82421421198915 | 2.01604498248456  |
| H | -2.84970329186579 | -1.93700356253590 | 1.56694852915695  |
| H | 0.23319726554648  | -6.52090523261757 | 1.72726534091406  |
| H | 2.19388271231038  | -5.08331612761522 | 1.51085746868447  |
| H | 4.14210152257983  | -0.52139388229937 | 1.19466867085887  |
| H | 3.84537490716777  | -0.75703082793943 | -0.52099826019108 |
| H | 2.05635793853740  | 2.61668881497957  | 1.13323823855565  |
| H | 2.57982236522961  | 1.36200925020101  | 2.23924466350122  |
| H | 0.16637771859103  | 1.08592539668303  | 1.95552915203338  |
| H | 0.28240988308069  | 1.27378532038614  | 0.21845141965404  |
| H | 3.69918324684503  | 4.84425635460007  | -0.25729830150382 |
| H | 2.46756303765031  | 6.36918370580471  | -1.76226452077910 |
| H | 1.51409842429289  | 3.06534271907873  | -4.31170907020813 |
| H | 2.74166682863737  | 1.55236915439685  | -2.81302139043820 |
| H | 0.87712007733416  | 6.67801344661280  | -3.58783951413494 |
| H | 1.81957375320980  | 6.02724727132552  | -4.92754394790276 |

H 0.28195979677162 5.28472520116911 -4.49584009476874

-----  
**CARTESIAN COORDINATES (A.U.)**  
-----

| NO | LB | ZA     | FRAG | MASS   | X         | Y          | Z         |
|----|----|--------|------|--------|-----------|------------|-----------|
| 0  | C  | 6.0000 | 0    | 12.011 | -7.146355 | -7.249800  | 3.471028  |
| 1  | C  | 6.0000 | 0    | 12.011 | -6.802722 | -9.883782  | 3.722215  |
| 2  | C  | 6.0000 | 0    | 12.011 | -4.425063 | -10.878590 | 3.630809  |
| 3  | C  | 6.0000 | 0    | 12.011 | -2.297484 | -9.286426  | 3.298114  |
| 4  | C  | 6.0000 | 0    | 12.011 | -2.638452 | -6.658213  | 3.072819  |
| 5  | C  | 6.0000 | 0    | 12.011 | -5.122442 | -5.673806  | 3.162280  |
| 6  | C  | 6.0000 | 0    | 12.011 | 0.203054  | -10.293715 | 3.149825  |
| 7  | C  | 6.0000 | 0    | 12.011 | 2.274031  | -8.796721  | 2.914418  |
| 8  | C  | 6.0000 | 0    | 12.011 | 2.011818  | -6.119393  | 2.829493  |
| 9  | C  | 6.0000 | 0    | 12.011 | -0.452546 | -5.043016  | 2.767792  |
| 10 | C  | 6.0000 | 0    | 12.011 | 4.201099  | -4.537324  | 2.675737  |
| 11 | C  | 6.0000 | 0    | 12.011 | 4.116063  | -2.264501  | 1.399557  |
| 12 | C  | 6.0000 | 0    | 12.011 | 1.716038  | -1.169611  | 1.685822  |
| 13 | C  | 6.0000 | 0    | 12.011 | -0.547349 | -2.600382  | 1.742826  |
| 14 | C  | 6.0000 | 0    | 12.011 | 6.432199  | -0.733339  | 0.755616  |
| 15 | C  | 6.0000 | 0    | 12.011 | 4.078695  | 2.911145   | 2.354448  |
| 16 | C  | 6.0000 | 0    | 12.011 | 1.515290  | 1.654401   | 2.063871  |
| 17 | N  | 7.0000 | 0    | 14.007 | 5.753924  | 1.919326   | 0.410395  |
| 18 | C  | 6.0000 | 0    | 12.011 | 6.190407  | 5.881442   | -2.711268 |
| 19 | C  | 6.0000 | 0    | 12.011 | 6.067241  | 8.434913   | -2.158247 |

|      |         |   |        |           |            |           |
|------|---------|---|--------|-----------|------------|-----------|
| 20 C | 6.0000  | 0 | 12.011 | 4.759860  | 10.041911  | -3.773128 |
| 21 C | 6.0000  | 0 | 12.011 | 3.590453  | 9.127431   | -5.940309 |
| 22 C | 6.0000  | 0 | 12.011 | 3.754021  | 6.541241   | -6.466752 |
| 23 C | 6.0000  | 0 | 12.011 | 5.049260  | 4.924785   | -4.880618 |
| 24 C | 6.0000  | 0 | 12.011 | 2.221085  | 10.879605  | -7.724173 |
| 25 S | 16.0000 | 0 | 32.060 | 7.924904  | 3.830736   | -0.729440 |
| 26 O | 8.0000  | 0 | 15.999 | 8.977395  | 5.331863   | 1.261161  |
| 27 O | 8.0000  | 0 | 15.999 | 9.547040  | 2.301675   | -2.256193 |
| 28 H | 1.0000  | 0 | 1.008  | -9.037566 | -6.472844  | 3.519083  |
| 29 H | 1.0000  | 0 | 1.008  | -8.423845 | -11.102914 | 3.976288  |
| 30 H | 1.0000  | 0 | 1.008  | -4.138370 | -12.895896 | 3.809773  |
| 31 H | 1.0000  | 0 | 1.008  | -5.385159 | -3.660406  | 2.961104  |
| 32 H | 1.0000  | 0 | 1.008  | 0.440679  | -12.322725 | 3.264058  |
| 33 H | 1.0000  | 0 | 1.008  | 4.145837  | -9.606075  | 2.855107  |
| 34 H | 1.0000  | 0 | 1.008  | 7.827437  | -0.985292  | 2.257597  |
| 35 H | 1.0000  | 0 | 1.008  | 7.266705  | -1.430581  | -0.984544 |
| 36 H | 1.0000  | 0 | 1.008  | 3.885953  | 4.944825   | 2.141510  |
| 37 H | 1.0000  | 0 | 1.008  | 4.875158  | 2.573824   | 4.231559  |
| 38 H | 1.0000  | 0 | 1.008  | 0.314408  | 2.052102   | 3.695415  |
| 39 H | 1.0000  | 0 | 1.008  | 0.533677  | 2.407105   | 0.412813  |
| 40 H | 1.0000  | 0 | 1.008  | 6.990443  | 9.154318   | -0.486223 |
| 41 H | 1.0000  | 0 | 1.008  | 4.663018  | 12.036013  | -3.330197 |
| 42 H | 1.0000  | 0 | 1.008  | 2.861231  | 5.792658   | -8.147949 |
| 43 H | 1.0000  | 0 | 1.008  | 5.180999  | 2.933553   | -5.315840 |
| 44 H | 1.0000  | 0 | 1.008  | 1.657517  | 12.619617  | -6.780034 |



|      |        |   |       |          |           |           |
|------|--------|---|-------|----------|-----------|-----------|
| 45 H | 1.0000 | 0 | 1.008 | 3.438496 | 11.389847 | -9.311709 |
| 46 H | 1.0000 | 0 | 1.008 | 0.532827 | 9.986683  | -8.495907 |

-----  
**INTERNAL COORDINATES (Å)**  
-----

|   |    |    |    |                |              |              |
|---|----|----|----|----------------|--------------|--------------|
| C | 0  | 0  | 0  | 0.000000000000 | 0.00000000   | 0.00000000   |
| C | 1  | 0  | 0  | 1.411925631028 | 0.00000000   | 0.00000000   |
| C | 2  | 1  | 0  | 1.364750099947 | 119.74840719 | 0.00000000   |
| C | 3  | 2  | 1  | 1.417193607157 | 120.49690527 | 0.31150000   |
| C | 4  | 3  | 2  | 1.407503994284 | 119.74446472 | 0.31557050   |
| C | 1  | 2  | 3  | 1.367215088217 | 120.83281343 | 359.32685146 |
| C | 4  | 3  | 2  | 1.428710987282 | 121.38580984 | 181.18897520 |
| C | 7  | 4  | 3  | 1.357971335214 | 122.33282613 | 182.20240322 |
| C | 8  | 7  | 4  | 1.424268992231 | 120.30192920 | 0.58265912   |
| C | 9  | 8  | 7  | 1.423426274069 | 119.21134091 | 354.46468978 |
| C | 9  | 8  | 7  | 1.431669421051 | 120.30821348 | 177.67712829 |
| C | 11 | 9  | 8  | 1.380086771815 | 120.73324926 | 147.75431592 |
| C | 12 | 11 | 9  | 1.404150562641 | 109.65155823 | 34.31225475  |
| C | 10 | 9  | 8  | 1.402669107991 | 114.22928092 | 203.10827332 |
| C | 12 | 11 | 9  | 1.508257743531 | 123.52031979 | 191.44557770 |
| C | 15 | 12 | 11 | 2.446694065712 | 86.08266053  | 226.54585642 |
| C | 13 | 12 | 11 | 1.511472153521 | 119.06603790 | 140.56845029 |
| N | 16 | 15 | 12 | 1.455904937524 | 33.02414501  | 222.08820855 |
| C | 18 | 16 | 15 | 2.679208099702 | 101.89097124 | 176.90260241 |

|   |    |    |    |                |              |              |
|---|----|----|----|----------------|--------------|--------------|
| C | 19 | 18 | 16 | 1.384100986389 | 129.01799765 | 29.80151672  |
| C | 20 | 19 | 18 | 1.389987195339 | 119.38777055 | 221.63199585 |
| C | 21 | 20 | 19 | 1.390080909596 | 121.05110781 | 359.56847162 |
| C | 22 | 21 | 20 | 1.399298449305 | 118.50179235 | 0.05726445   |
| C | 23 | 22 | 21 | 1.380574185342 | 121.04084529 | 359.85899683 |
| C | 22 | 21 | 20 | 1.508614694358 | 121.07077084 | 181.38684789 |
| S | 18 | 16 | 15 | 1.645210959726 | 117.55568361 | 216.12799387 |
| O | 26 | 18 | 16 | 1.432068562719 | 110.05523198 | 39.61443422  |
| O | 26 | 18 | 16 | 1.429789905976 | 106.16885595 | 170.58549910 |
| H | 1  | 2  | 3  | 1.082248202460 | 119.46687847 | 179.16539338 |
| H | 2  | 1  | 3  | 1.081759838704 | 119.88798379 | 180.31096722 |
| H | 3  | 2  | 1  | 1.082389774134 | 120.43436185 | 180.36919429 |
| H | 6  | 1  | 2  | 1.079738062496 | 120.85255037 | 179.70231834 |
| H | 7  | 4  | 3  | 1.082732894512 | 118.32506542 | 1.09513763   |
| H | 8  | 7  | 4  | 1.079603616349 | 120.77536022 | 178.40427247 |
| H | 15 | 12 | 11 | 1.092993187859 | 108.60918884 | 326.70308991 |
| H | 15 | 12 | 11 | 1.085871733518 | 109.84848666 | 84.00426629  |
| H | 16 | 15 | 12 | 1.086856580592 | 142.41129699 | 208.81058569 |
| H | 16 | 15 | 12 | 1.093706537849 | 89.38449723  | 91.12276784  |
| H | 17 | 13 | 12 | 1.092493685327 | 109.62987274 | 230.13825101 |
| H | 17 | 13 | 12 | 1.091711608721 | 106.75305811 | 115.06210840 |
| H | 20 | 19 | 18 | 1.080028267492 | 119.73760131 | 41.84621161  |
| H | 21 | 20 | 19 | 1.082165284648 | 119.14218925 | 179.79631137 |
| H | 23 | 22 | 21 | 1.082406700666 | 119.64122758 | 180.18838043 |
| H | 24 | 23 | 22 | 1.080841244468 | 120.43196145 | 180.66574010 |

|   |    |    |    |                |              |              |
|---|----|----|----|----------------|--------------|--------------|
| H | 25 | 22 | 21 | 1.089212044297 | 111.34998064 | 337.82026604 |
| H | 25 | 22 | 21 | 1.092555973984 | 110.47484803 | 97.54088457  |
| H | 25 | 22 | 21 | 1.090040560099 | 111.20357878 | 216.94716532 |

-----

**INTERNAL COORDINATES (A.U.)**

-----

|   |    |    |    |                |              |              |
|---|----|----|----|----------------|--------------|--------------|
| C | 0  | 0  | 0  | 0.000000000000 | 0.00000000   | 0.00000000   |
| C | 1  | 0  | 0  | 2.668152764107 | 0.00000000   | 0.00000000   |
| C | 2  | 1  | 0  | 2.579003930141 | 119.74840719 | 0.00000000   |
| C | 3  | 2  | 1  | 2.678107796271 | 120.49690527 | 0.31150000   |
| C | 4  | 3  | 2  | 2.659797081597 | 119.74446472 | 0.31557050   |
| C | 1  | 2  | 3  | 2.583662082896 | 120.83281343 | 359.32685146 |
| C | 4  | 3  | 2  | 2.699872490488 | 121.38580984 | 181.18897520 |
| C | 7  | 4  | 3  | 2.566193921270 | 122.33282613 | 182.20240322 |
| C | 8  | 7  | 4  | 2.691478336353 | 120.30192920 | 0.58265912   |
| C | 9  | 8  | 7  | 2.689885829818 | 119.21134091 | 354.46468978 |
| C | 9  | 8  | 7  | 2.705463120095 | 120.30821348 | 177.67712829 |
| C | 11 | 9  | 8  | 2.607986039777 | 120.73324926 | 147.75431592 |
| C | 12 | 11 | 9  | 2.653460014184 | 109.65155823 | 34.31225475  |
| C | 10 | 9  | 8  | 2.650660470614 | 114.22928092 | 203.10827332 |
| C | 12 | 11 | 9  | 2.850194074640 | 123.52031979 | 191.44557770 |
| C | 15 | 12 | 11 | 4.623581717686 | 86.08266053  | 226.54585642 |
| C | 13 | 12 | 11 | 2.856268429202 | 119.06603790 | 140.56845029 |
| N | 16 | 15 | 12 | 2.751261608945 | 33.02414501  | 222.08820855 |

|   |    |    |    |                |              |              |
|---|----|----|----|----------------|--------------|--------------|
| C | 18 | 16 | 15 | 5.062969564219 | 101.89097124 | 176.90260241 |
| C | 19 | 18 | 16 | 2.615571805965 | 129.01799765 | 29.80151672  |
| C | 20 | 19 | 18 | 2.626695128848 | 119.38777055 | 221.63199585 |
| C | 21 | 20 | 19 | 2.626872223129 | 121.05110781 | 359.56847162 |
| C | 22 | 21 | 20 | 2.644290848807 | 118.50179235 | 0.05726445   |
| C | 23 | 22 | 21 | 2.608907117859 | 121.04084529 | 359.85899683 |
| C | 22 | 21 | 20 | 2.850868613946 | 121.07077084 | 181.38684789 |
| S | 18 | 16 | 15 | 3.108998146409 | 117.55568361 | 216.12799387 |
| O | 26 | 18 | 16 | 2.706217388537 | 110.05523198 | 39.61443422  |
| O | 26 | 18 | 16 | 2.701911351339 | 106.16885595 | 170.58549910 |
| H | 1  | 2  | 3  | 2.045152711578 | 119.46687847 | 179.16539338 |
| H | 2  | 1  | 3  | 2.044229837826 | 119.88798379 | 180.31096722 |
| H | 3  | 2  | 1  | 2.045420243270 | 120.43436185 | 180.36919429 |
| H | 6  | 1  | 2  | 2.040409234488 | 120.85255037 | 179.70231834 |
| H | 7  | 4  | 3  | 2.046068646816 | 118.32506542 | 1.09513763   |
| H | 8  | 7  | 4  | 2.040155168090 | 120.77536022 | 178.40427247 |
| H | 15 | 12 | 11 | 2.065457791295 | 108.60918884 | 326.70308991 |
| H | 15 | 12 | 11 | 2.052000192916 | 109.84848666 | 84.00426629  |
| H | 16 | 15 | 12 | 2.053861284169 | 142.41129699 | 208.81058569 |
| H | 16 | 15 | 12 | 2.066805827415 | 89.38449723  | 91.12276784  |
| H | 17 | 13 | 12 | 2.064513868306 | 109.62987274 | 230.13825101 |
| H | 17 | 13 | 12 | 2.063035957705 | 106.75305811 | 115.06210840 |
| H | 20 | 19 | 18 | 2.040957642452 | 119.73760131 | 41.84621161  |
| H | 21 | 20 | 19 | 2.044996019622 | 119.14218925 | 179.79631137 |
| H | 23 | 22 | 21 | 2.045452229781 | 119.64122758 | 180.18838043 |

|   |    |    |    |                |              |              |
|---|----|----|----|----------------|--------------|--------------|
| H | 24 | 23 | 22 | 2.042493946292 | 120.43196145 | 180.66574010 |
| H | 25 | 22 | 21 | 2.058312465489 | 111.34998064 | 337.82026604 |
| H | 25 | 22 | 21 | 2.064631576810 | 110.47484803 | 97.54088457  |
| H | 25 | 22 | 21 | 2.059878133454 | 111.20357878 | 216.94716532 |

## References

1. (a) X. Yang, G. Xu and W. Tang, *Tetrahedron*, 2016, **72**, 5178. (b) J. Feng, B. Li and Y. He, Z. Gu, *Angew. Chem. Int. Ed.*, 2016, **55**, 2186. (c) Z.-S. Liu, Y. Hua, Q. Gao, Y. Ma, H. Tang, Y. Shang, H.-G. Cheng and Q. Zhou, *Nat. Catal.* 2020, **3**, 727.
2. M. Satoh, Y. Shibata and K. Tanaka, *Chem. - A Eur. J.*, 2018, **24**, 5434.
